# Supplementary material for: The inherent mutational tolerance and antigenic evolvability of influenza hemagglutinin
Source: eLife journal article supplement (doi:10.7554/elife.03300), 2014-07-08

A

## Multi-nucleotide codon mutations

all

synonymous

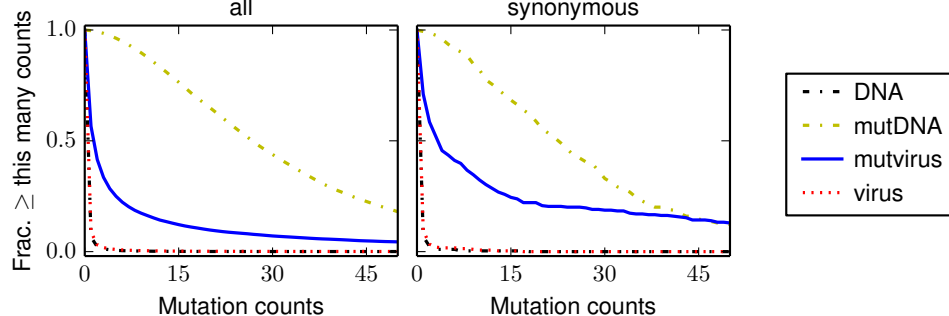

B

## Multi-nucleotide codon mutations

all

synonymous

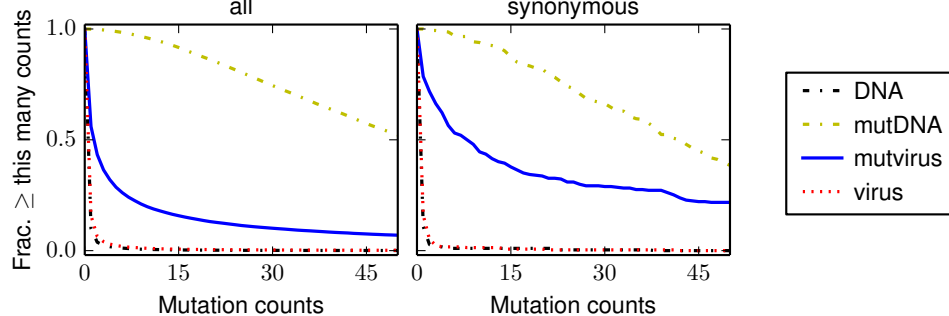

C

## Multi-nucleotide codon mutations

all

synonymous

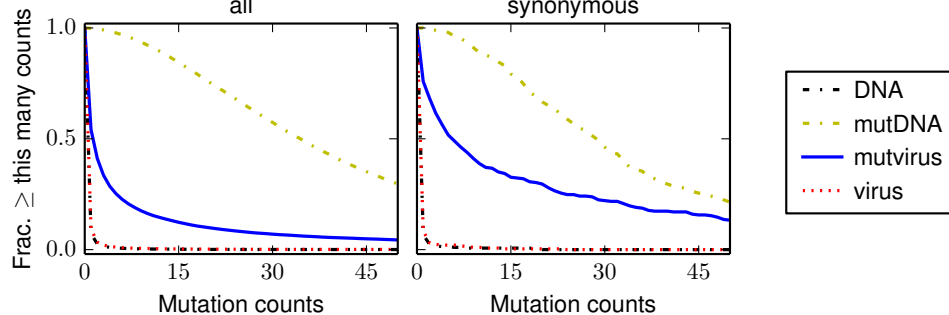

Supplement: supp [file elife-03300-supp-v1.zip]
