# Supplementary material for: The inherent mutational tolerance and antigenic evolvability of influenza hemagglutinin
Source: eLife journal article supplement (doi:10.7554/elife.03300), 2014-07-08
Supplement: supp [file elife_poa_e03300_Supplementary_file_2.xls]

## Sheet: Plate Specs
Plate Name	Well Position	Sequence Name	Sequence
Plate1	A01	WSN-for-mut2	TAA AAA CAA CCA AAA TGN NNG CAA AAC TAC TGG TCC T
Plate1	A02	WSN-for-mut3	AAA CAA CCA AAA TGA AGN NNA AAC TAC TGG TCC TGT T
Plate1	A03	WSN-for-mut4	CAA CCA AAA TGA AGG CAN NNC TAC TGG TCC TGT TAT A
Plate1	A04	WSN-for-mut5	CCA AAA TGA AGG CAA AAN NNC TGG TCC TGT TAT ATG C
Plate1	A05	WSN-for-mut6	AAA TGA AGG CAA AAC TAN NNG TCC TGT TAT ATG CAT T
Plate1	A06	WSN-for-mut7	TGA AGG CAA AAC TAC TGN NNC TGT TAT ATG CAT TTG T
Plate1	A07	WSN-for-mut8	AGG CAA AAC TAC TGG TCN NNT TAT ATG CAT TTG TAG C
Plate1	A08	WSN-for-mut9	CAA AAC TAC TGG TCC TGN NNT ATG CAT TTG TAG CTA C
Plate1	A09	WSN-for-mut10	AAC TAC TGG TCC TGT TAN NNG CAT TTG TAG CTA CAG A
Plate1	A10	WSN-for-mut11	TAC TGG TCC TGT TAT ATN NNT TTG TAG CTA CAG ATG C
Plate1	A11	WSN-for-mut12	TGG TCC TGT TAT ATG CAN NNG TAG CTA CAG ATG CAG A
Plate1	A12	WSN-for-mut13	TCC TGT TAT ATG CAT TTN NNG CTA CAG ATG CAG ACA C
Plate1	B01	WSN-for-mut14	TGT TAT ATG CAT TTG TAN NNA CAG ATG CAG ACA CAA T
Plate1	B02	WSN-for-mut15	TAT ATG CAT TTG TAG CTN NNG ATG CAG ACA CAA TAT G
Plate1	B03	WSN-for-mut16	ATG CAT TTG TAG CTA CAN NNG CAG ACA CAA TAT GTA T
Plate1	B04	WSN-for-mut17	CAT TTG TAG CTA CAG ATN NNG ACA CAA TAT GTA TAG G
Plate1	B05	WSN-for-mut18	TTG TAG CTA CAG ATG CAN NNA CAA TAT GTA TAG GCT A
Plate1	B06	WSN-for-mut19	TAG CTA CAG ATG CAG ACN NNA TAT GTA TAG GCT ACC A
Plate1	B07	WSN-for-mut20	CTA CAG ATG CAG ACA CAN NNT GTA TAG GCT ACC ATG C
Plate1	B08	WSN-for-mut21	CAG ATG CAG ACA CAA TAN NNA TAG GCT ACC ATG CGA A
Plate1	B09	WSN-for-mut22	ATG CAG ACA CAA TAT GTN NNG GCT ACC ATG CGA ACA A
Plate1	B10	WSN-for-mut23	CAG ACA CAA TAT GTA TAN NNT ACC ATG CGA ACA ACT C
Plate1	B11	WSN-for-mut24	ACA CAA TAT GTA TAG GCN NNC ATG CGA ACA ACT CAA C
Plate1	B12	WSN-for-mut25	CAA TAT GTA TAG GCT ACN NNG CGA ACA ACT CAA CCG A
Plate1	C01	WSN-for-mut26	TAT GTA TAG GCT ACC ATN NNA ACA ACT CAA CCG ACA C
Plate1	C02	WSN-for-mut27	GTA TAG GCT ACC ATG CGN NNA ACT CAA CCG ACA CTG T
Plate1	C03	WSN-for-mut28	TAG GCT ACC ATG CGA ACN NNT CAA CCG ACA CTG TTG A
Plate1	C04	WSN-for-mut29	GCT ACC ATG CGA ACA ACN NNA CCG ACA CTG TTG ACA C
Plate1	C05	WSN-for-mut30	ACC ATG CGA ACA ACT CAN NNG ACA CTG TTG ACA CAA T
Plate1	C06	WSN-for-mut31	ATG CGA ACA ACT CAA CCN NNA CTG TTG ACA CAA TAC T
Plate1	C07	WSN-for-mut32	CGA ACA ACT CAA CCG ACN NNG TTG ACA CAA TAC TCG A
Plate1	C08	WSN-for-mut33	ACA ACT CAA CCG ACA CTN NNG ACA CAA TAC TCG AGA A
Plate1	C09	WSN-for-mut34	ACT CAA CCG ACA CTG TTN NNA CAA TAC TCG AGA AGA A
Plate1	C10	WSN-for-mut35	CAA CCG ACA CTG TTG ACN NNA TAC TCG AGA AGA ATG T
Plate1	C11	WSN-for-mut36	CCG ACA CTG TTG ACA CAN NNC TCG AGA AGA ATG TGG C
Plate1	C12	WSN-for-mut37	ACA CTG TTG ACA CAA TAN NNG AGA AGA ATG TGG CAG T
Plate1	D01	WSN-for-mut38	CTG TTG ACA CAA TAC TCN NNA AGA ATG TGG CAG TGA C
Plate1	D02	WSN-for-mut39	TTG ACA CAA TAC TCG AGN NNA ATG TGG CAG TGA CAC A
Plate1	D03	WSN-for-mut40	ACA CAA TAC TCG AGA AGN NNG TGG CAG TGA CAC ATT C
Plate1	D04	WSN-for-mut41	CAA TAC TCG AGA AGA ATN NNG CAG TGA CAC ATT CTG T
Plate1	D05	WSN-for-mut42	TAC TCG AGA AGA ATG TGN NNG TGA CAC ATT CTG TTA A
Plate1	D06	WSN-for-mut43	TCG AGA AGA ATG TGG CAN NNA CAC ATT CTG TTA ACC T
Plate1	D07	WSN-for-mut44	AGA AGA ATG TGG CAG TGN NNC ATT CTG TTA ACC TGC T
Plate1	D08	WSN-for-mut45	AGA ATG TGG CAG TGA CAN NNT CTG TTA ACC TGC TCG A
Plate1	D09	WSN-for-mut46	ATG TGG CAG TGA CAC ATN NNG TTA ACC TGC TCG AAG A
Plate1	D10	WSN-for-mut47	TGG CAG TGA CAC ATT CTN NNA ACC TGC TCG AAG ACA G
Plate1	D11	WSN-for-mut48	CAG TGA CAC ATT CTG TTN NNC TGC TCG AAG ACA GCC A
Plate1	D12	WSN-for-mut49	TGA CAC ATT CTG TTA ACN NNC TCG AAG ACA GCC ACA A
Plate1	E01	WSN-for-mut50	CAC ATT CTG TTA ACC TGN NNG AAG ACA GCC ACA ACG G
Plate1	E02	WSN-for-mut51	ATT CTG TTA ACC TGC TCN NNG ACA GCC ACA ACG GGA A
Plate1	E03	WSN-for-mut52	CTG TTA ACC TGC TCG AAN NNA GCC ACA ACG GGA AAC T
Plate1	E04	WSN-for-mut53	TTA ACC TGC TCG AAG ACN NNC ACA ACG GGA AAC TAT G
Plate1	E05	WSN-for-mut54	ACC TGC TCG AAG ACA GCN NNA ACG GGA AAC TAT GTA A
Plate1	E06	WSN-for-mut55	TGC TCG AAG ACA GCC ACN NNG GGA AAC TAT GTA AAT T
Plate1	E07	WSN-for-mut56	TCG AAG ACA GCC ACA ACN NNA AAC TAT GTA AAT TAA A
Plate1	E08	WSN-for-mut57	AAG ACA GCC ACA ACG GGN NNC TAT GTA AAT TAA AAG G
Plate1	E09	WSN-for-mut58	ACA GCC ACA ACG GGA AAN NNT GTA AAT TAA AAG GAA T
Plate1	E10	WSN-for-mut59	GCC ACA ACG GGA AAC TAN NNA AAT TAA AAG GAA TAG C
Plate1	E11	WSN-for-mut60	ACA ACG GGA AAC TAT GTN NNT TAA AAG GAA TAG CCC C
Plate1	E12	WSN-for-mut61	ACG GGA AAC TAT GTA AAN NNA AAG GAA TAG CCC CAC T
Plate1	F01	WSN-for-mut62	GGA AAC TAT GTA AAT TAN NNG GAA TAG CCC CAC TAC A
Plate1	F02	WSN-for-mut63	AAC TAT GTA AAT TAA AAN NNA TAG CCC CAC TAC AAT T
Plate1	F03	WSN-for-mut64	TAT GTA AAT TAA AAG GAN NNG CCC CAC TAC AAT TGG G
Plate1	F04	WSN-for-mut65	GTA AAT TAA AAG GAA TAN NNC CAC TAC AAT TGG GGA A
Plate1	F05	WSN-for-mut66	AAT TAA AAG GAA TAG CCN NNC TAC AAT TGG GGA AAT G
Plate1	F06	WSN-for-mut67	TAA AAG GAA TAG CCC CAN NNC AAT TGG GGA AAT GTA A
Plate1	F07	WSN-for-mut68	AAG GAA TAG CCC CAC TAN NNT TGG GGA AAT GTA ACA T
Plate1	F08	WSN-for-mut69	GAA TAG CCC CAC TAC AAN NNG GGA AAT GTA ACA TCA C
Plate1	F09	WSN-for-mut70	TAG CCC CAC TAC AAT TGN NNA AAT GTA ACA TCA CCG G
Plate1	F10	WSN-for-mut71	CCC CAC TAC AAT TGG GGN NNT GTA ACA TCA CCG GAT G
Plate1	F11	WSN-for-mut72	CAC TAC AAT TGG GGA AAN NNA ACA TCA CCG GAT GGC T
Plate1	F12	WSN-for-mut73	TAC AAT TGG GGA AAT GTN NNA TCA CCG GAT GGC TCT T
Plate1	G01	WSN-for-mut74	AAT TGG GGA AAT GTA ACN NNA CCG GAT GGC TCT TGG G
Plate1	G02	WSN-for-mut75	TGG GGA AAT GTA ACA TCN NNG GAT GGC TCT TGG GAA A
Plate1	G03	WSN-for-mut76	GGA AAT GTA ACA TCA CCN NNT GGC TCT TGG GAA ATC C
Plate1	G04	WSN-for-mut77	AAT GTA ACA TCA CCG GAN NNC TCT TGG GAA ATC CAG A
Plate1	G05	WSN-for-mut78	GTA ACA TCA CCG GAT GGN NNT TGG GAA ATC CAG AAT G
Plate1	G06	WSN-for-mut79	ACA TCA CCG GAT GGC TCN NNG GAA ATC CAG AAT GCG A
Plate1	G07	WSN-for-mut80	TCA CCG GAT GGC TCT TGN NNA ATC CAG AAT GCG ACT C
Plate1	G08	WSN-for-mut81	CCG GAT GGC TCT TGG GAN NNC CAG AAT GCG ACT CAC T
Plate1	G09	WSN-for-mut82	GAT GGC TCT TGG GAA ATN NNG AAT GCG ACT CAC TGC T
Plate1	G10	WSN-for-mut83	GGC TCT TGG GAA ATC CAN NNT GCG ACT CAC TGC TTC C
Plate1	G11	WSN-for-mut84	TCT TGG GAA ATC CAG AAN NNG ACT CAC TGC TTC CAG C
Plate1	G12	WSN-for-mut85	TGG GAA ATC CAG AAT GCN NNT CAC TGC TTC CAG CGA G
Plate1	H01	WSN-for-mut86	GAA ATC CAG AAT GCG ACN NNC TGC TTC CAG CGA GAT C
Plate1	H02	WSN-for-mut87	ATC CAG AAT GCG ACT CAN NNC TTC CAG CGA GAT CAT G
Plate1	H03	WSN-for-mut88	CAG AAT GCG ACT CAC TGN NNC CAG CGA GAT CAT GGT C
Plate1	H04	WSN-for-mut89	AAT GCG ACT CAC TGC TTN NNG CGA GAT CAT GGT CCT A
Plate1	H05	WSN-for-mut90	GCG ACT CAC TGC TTC CAN NNA GAT CAT GGT CCT ACA T
Plate1	H06	WSN-for-mut91	ACT CAC TGC TTC CAG CGN NNT CAT GGT CCT ACA TTG T
Plate1	H07	WSN-for-mut92	CAC TGC TTC CAG CGA GAN NNT GGT CCT ACA TTG TAG A
Plate1	H08	WSN-for-mut93	TGC TTC CAG CGA GAT CAN NNT CCT ACA TTG TAG AAA C
Plate1	H09	WSN-for-mut94	TTC CAG CGA GAT CAT GGN NNT ACA TTG TAG AAA CAC C
Plate1	H10	WSN-for-mut95	CAG CGA GAT CAT GGT CCN NNA TTG TAG AAA CAC CAA A
Plate1	H11	WSN-for-mut96	CGA GAT CAT GGT CCT ACN NNG TAG AAA CAC CAA ACT C
Plate1	H12	WSN-for-mut97	GAT CAT GGT CCT ACA TTN NNG AAA CAC CAA ACT CTG A
Plate10	A01	WSN-rev-mut290	TGA CAC TTC GTG TTA CAN NNA TGC ATT GAC GCG TTT G
Plate10	A02	WSN-rev-mut291	GTT TGA CAC TTC GTG TTN NNC TCA TGC ATT GAC GCG T
Plate10	A03	WSN-rev-mut292	GGT GTT TGA CAC TTC GTN NNA CAC TCA TGC ATT GAC G
Plate10	A04	WSN-rev-mut293	TGG GGT GTT TGA CAC TTN NNG TTA CAC TCA TGC ATT G
Plate10	A05	WSN-rev-mut294	CCC TGG GGT GTT TGA CAN NNC GTG TTA CAC TCA TGC A
Plate10	A06	WSN-rev-mut295	GCT CCC TGG GGT GTT TGN NNC TTC GTG TTA CAC TCA T
Plate10	A07	WSN-rev-mut296	ATA GCT CCC TGG GGT GTN NNA CAC TTC GTG TTA CAC T
Plate10	A08	WSN-rev-mut297	TTT ATA GCT CCC TGG GGN NNT TGA CAC TTC GTG TTA C
Plate10	A09	WSN-rev-mut298	CTG TTT ATA GCT CCC TGN NNT GTT TGA CAC TTC GTG T
Plate10	A10	WSN-rev-mut299	TTG CTG TTT ATA GCT CCN NNG GGT GTT TGA CAC TTC G
Plate10	A11	WSN-rev-mut300	AGA TTG CTG TTT ATA GCN NNC TGG GGT GTT TGA CAC T
Plate10	A12	WSN-rev-mut301	GGG AGA TTG CTG TTT ATN NNT CCC TGG GGT GTT TGA C
Plate10	B01	WSN-rev-mut302	AAA GGG AGA TTG CTG TTN NNA GCT CCC TGG GGT GTT T
Plate10	B02	WSN-rev-mut303	TGG AAA GGG AGA TTG CTN NNT ATA GCT CCC TGG GGT G
Plate10	B03	WSN-rev-mut304	TTC TGG AAA GGG AGA TTN NNG TTT ATA GCT CCC TGG G
Plate10	B04	WSN-rev-mut305	ATA TTC TGG AAA GGG AGN NNG CTG TTT ATA GCT CCC T
Plate10	B05	WSN-rev-mut306	TGT ATA TTC TGG AAA GGN NNA TTG CTG TTT ATA GCT C
Plate10	B06	WSN-rev-mut307	GGG TGT ATA TTC TGG AAN NNG AGA TTG CTG TTT ATA G
Plate10	B07	WSN-rev-mut308	ACT GGG TGT ATA TTC TGN NNA GGG AGA TTG CTG TTT A
Plate10	B08	WSN-rev-mut309	GTG ACT GGG TGT ATA TTN NNG AAA GGG AGA TTG CTG T
Plate10	B09	WSN-rev-mut310	ATT GTG ACT GGG TGT ATN NNC TGG AAA GGG AGA TTG C
Plate10	B10	WSN-rev-mut311	CCT ATT GTG ACT GGG TGN NNA TTC TGG AAA GGG AGA T
Plate10	B11	WSN-rev-mut312	TCT CCT ATT GTG ACT GGN NNT ATA TTC TGG AAA GGG A
Plate10	B12	WSN-rev-mut313	CAC TCT CCT ATT GTG ACN NNG TGT ATA TTC TGG AAA G
Plate10	C01	WSN-rev-mut314	GGG CAC TCT CCT ATT GTN NNT GGG TGT ATA TTC TGG A
Plate10	C02	WSN-rev-mut315	TTT GGG CAC TCT CCT ATN NNG ACT GGG TGT ATA TTC T
Plate10	C03	WSN-rev-mut316	TAT TTT GGG CAC TCT CCN NNT GTG ACT GGG TGT ATA T
Plate10	C04	WSN-rev-mut317	ACA TAT TTT GGG CAC TCN NNT ATT GTG ACT GGG TGT A
Plate10	C05	WSN-rev-mut318	CTG ACA TAT TTT GGG CAN NNT CCT ATT GTG ACT GGG T
Plate10	C06	WSN-rev-mut319	CTC CTG ACA TAT TTT GGN NNC TCT CCT ATT GTG ACT G
Plate10	C07	WSN-rev-mut320	GTA CTC CTG ACA TAT TTN NNG CAC TCT CCT ATT GTG A
Plate10	C08	WSN-rev-mut321	TTG GTA CTC CTG ACA TAN NNT GGG CAC TCT CCT ATT G
Plate10	C09	WSN-rev-mut322	AAT TTG GTA CTC CTG ACN NNT TTT GGG CAC TCT CCT A
Plate10	C10	WSN-rev-mut323	CTC AAT TTG GTA CTC CTN NNA TAT TTT GGG CAC TCT C
Plate10	C11	WSN-rev-mut324	ATC CTC AAT TTG GTA CTN NNG ACA TAT TTT GGG CAC T
Plate10	C12	WSN-rev-mut325	ACC ATC CTC AAT TTG GTN NNC CTG ACA TAT TTT GGG C
Plate10	D01	WSN-rev-mut326	GTA ACC ATC CTC AAT TTN NNA CTC CTG ACA TAT TTT G
Plate10	D02	WSN-rev-mut327	CCT GTA ACC ATC CTC AAN NNG GTA CTC CTG ACA TAT T
Plate10	D03	WSN-rev-mut328	AGT CCT GTA ACC ATC CTN NNT TTG GTA CTC CTG ACA T
Plate10	D04	WSN-rev-mut329	CTT AGT CCT GTA ACC ATN NNC AAT TTG GTA CTC CTG A
Plate10	D05	WSN-rev-mut330	TTT CTT AGT CCT GTA ACN NNC CTC AAT TTG GTA CTC C
Plate10	D06	WSN-rev-mut331	ATG TTT CTT AGT CCT GTN NNC ATC CTC AAT TTG GTA C
Plate10	D07	WSN-rev-mut332	GGG ATG TTT CTT AGT CCN NNA ACC ATC CTC AAT TTG G
Plate10	D08	WSN-rev-mut333	GAT GGG ATG TTT CTT AGN NNT GTA ACC ATC CTC AAT T
Plate10	D09	WSN-rev-mut334	ATG GAT GGG ATG TTT CTN NNT CCT GTA ACC ATC CTC A
Plate10	D10	WSN-rev-mut335	TGA ATG GAT GGG ATG TTN NNT AGT CCT GTA ACC ATC C
Plate10	D11	WSN-rev-mut336	TAT TGA ATG GAT GGG ATN NNT CTT AGT CCT GTA ACC A
Plate10	D12	WSN-rev-mut337	CTG TAT TGA ATG GAT GGN NNG TTT CTT AGT CCT GTA A
Plate10	E01	WSN-rev-mut338	CCT CTG TAT TGA ATG GAN NNG ATG TTT CTT AGT CCT G
Plate10	E02	WSN-rev-mut339	AGA CCT CTG TAT TGA ATN NNT GGG ATG TTT CTT AGT C
Plate10	E03	WSN-rev-mut340	AAT AGA CCT CTG TAT TGN NNG GAT GGG ATG TTT CTT A
Plate10	E04	WSN-rev-mut341	CCA AAT AGA CCT CTG TAN NNA ATG GAT GGG ATG TTT C
Plate10	E05	WSN-rev-mut342	GCT CCA AAT AGA CCT CTN NNT TGA ATG GAT GGG ATG T
Plate10	E06	WSN-rev-mut343	ATG GCT CCA AAT AGA CCN NNG TAT TGA ATG GAT GGG A
Plate10	E07	WSN-rev-mut344	GCA ATG GCT CCA AAT AGN NNT CTG TAT TGA ATG GAT G
Plate10	E08	WSN-rev-mut345	CCA GCA ATG GCT CCA AAN NNA CCT CTG TAT TGA ATG G
Plate10	E09	WSN-rev-mut346	AAA CCA GCA ATG GCT CCN NNT AGA CCT CTG TAT TGA A
Plate10	E10	WSN-rev-mut347	ATA AAA CCA GCA ATG GCN NNA AAT AGA CCT CTG TAT T
Plate10	E11	WSN-rev-mut348	TCA ATA AAA CCA GCA ATN NNT CCA AAT AGA CCT CTG T
Plate10	E12	WSN-rev-mut349	CCC TCA ATA AAA CCA GCN NNG GCT CCA AAT AGA CCT C
Plate10	F01	WSN-rev-mut350	CCC CCC TCA ATA AAA CCN NNA ATG GCT CCA AAT AGA C
Plate10	F02	WSN-rev-mut351	CAT CCC CCC TCA ATA AAN NNA GCA ATG GCT CCA AAT A
Plate10	F03	WSN-rev-mut352	GTC CAT CCC CCC TCA ATN NNA CCA GCA ATG GCT CCA A
Plate10	F04	WSN-rev-mut353	CCA GTC CAT CCC CCC TCN NNA AAA CCA GCA ATG GCT C
Plate10	F05	WSN-rev-mut354	ATT CCA GTC CAT CCC CCN NNA ATA AAA CCA GCA ATG G
Plate10	F06	WSN-rev-mut355	ATC ATT CCA GTC CAT CCN NNC TCA ATA AAA CCA GCA A
Plate10	F07	WSN-rev-mut356	TCT ATC ATT CCA GTC CAN NNC CCC TCA ATA AAA CCA G
Plate10	F08	WSN-rev-mut357	CCA TCT ATC ATT CCA GTN NNT CCC CCC TCA ATA AAA C
Plate10	F09	WSN-rev-mut358	CAT CCA TCT ATC ATT CCN NNC CAT CCC CCC TCA ATA A
Plate10	F10	WSN-rev-mut359	TAC CAT CCA TCT ATC ATN NNA GTC CAT CCC CCC TCA A
Plate10	F11	WSN-rev-mut360	CCA TAC CAT CCA TCT ATN NNT CCA GTC CAT CCC CCC T
Plate10	F12	WSN-rev-mut361	TAA CCA TAC CAT CCA TCN NNC ATT CCA GTC CAT CCC C
Plate10	G01	WSN-rev-mut362	TGA TAA CCA TAC CAT CCN NNT ATC ATT CCA GTC CAT C
Plate10	G02	WSN-rev-mut363	TGA TGA TAA CCA TAC CAN NNA TCT ATC ATT CCA GTC C
Plate10	G03	WSN-rev-mut364	TGA TGA TGA TAA CCA TAN NNT CCA TCT ATC ATT CCA G
Plate10	G04	WSN-rev-mut365	TTC TGA TGA TGA TAA CCN NNC CAT CCA TCT ATC ATT C
Plate10	G05	WSN-rev-mut366	TCA TTC TGA TGA TGA TAN NNA TAC CAT CCA TCT ATC A
Plate10	G06	WSN-rev-mut367	TGT TCA TTC TGA TGA TGN NNA CCA TAC CAT CCA TCT A
Plate10	G07	WSN-rev-mut368	CCC TGT TCA TTC TGA TGN NNA TAA CCA TAC CAT CCA T
Plate10	G08	WSN-rev-mut369	GAT CCC TGT TCA TTC TGN NNA TGA TAA CCA TAC CAT C
Plate10	G09	WSN-rev-mut370	CCT GAT CCC TGT TCA TTN NNA TGA TGA TAA CCA TAC C
Plate10	G10	WSN-rev-mut371	TAG CCT GAT CCC TGT TCN NNC TGA TGA TGA TAA CCA T
Plate10	G11	WSN-rev-mut372	GCA TAG CCT GAT CCC TGN NNA TTC TGA TGA TGA TAA C
Plate10	G12	WSN-rev-mut373	GCT GCA TAG CCT GAT CCN NNT TCA TTC TGA TGA TGA T
Plate10	H01	WSN-rev-mut374	TCC GCT GCA TAG CCT GAN NNC TGT TCA TTC TGA TGA T
Plate10	H02	WSN-rev-mut375	TGA TCC GCT GCA TAG CCN NNT CCC TGT TCA TTC TGA T
Plate10	H03	WSN-rev-mut376	TTT TGA TCC GCT GCA TAN NNT GAT CCC TGT TCA TTC T
Plate10	H04	WSN-rev-mut377	CTT TTT TGA TCC GCT GCN NNG CCT GAT CCC TGT TCA T
Plate10	H05	WSN-rev-mut378	GTG CTT TTT TGA TCC GCN NNA TAG CCT GAT CCC TGT T
Plate10	H06	WSN-rev-mut379	TGT GTG CTT TTT TGA TCN NNT GCA TAG CCT GAT CCC T
Plate10	H07	WSN-rev-mut380	TTT TGT GTG CTT TTT TGN NNC GCT GCA TAG CCT GAT C
Plate10	H08	WSN-rev-mut381	GCA TTT TGT GTG CTT TTN NNA TCC GCT GCA TAG CCT G
Plate10	H09	WSN-rev-mut382	ATG GCA TTT TGT GTG CTN NNT TGA TCC GCT GCA TAG C
Plate10	H10	WSN-rev-mut383	TTA ATG GCA TTT TGT GTN NNT TTT TGA TCC GCT GCA T
Plate10	H11	WSN-rev-mut384	CCG TTA ATG GCA TTT TGN NNG CTT TTT TGA TCC GCT G
Plate10	H12	WSN-rev-mut385	ATC CCG TTA ATG GCA TTN NNT GTG CTT TTT TGA TCC G
Plate11	A01	WSN-rev-mut386	GTA ATC CCG TTA ATG GCN NNT TGT GTG CTT TTT TGA T
Plate11	A02	WSN-rev-mut387	TTT GTA ATC CCG TTA ATN NNA TTT TGT GTG CTT TTT T
Plate11	A03	WSN-rev-mut388	TTG TTT GTA ATC CCG TTN NNG GCA TTT TGT GTG CTT T
Plate11	A04	WSN-rev-mut389	ACC TTG TTT GTA ATC CCN NNA ATG GCA TTT TGT GTG C
Plate11	A05	WSN-rev-mut390	TTC ACC TTG TTT GTA ATN NNG TTA ATG GCA TTT TGT G
Plate11	A06	WSN-rev-mut391	GAG TTC ACC TTG TTT GTN NNC CCG TTA ATG GCA TTT T
Plate11	A07	WSN-rev-mut392	ACA GAG TTC ACC TTG TTN NNA ATC CCG TTA ATG GCA T
Plate11	A08	WSN-rev-mut393	ATA ACA GAG TTC ACC TTN NNT GTA ATC CCG TTA ATG G
Plate11	A09	WSN-rev-mut394	TCG ATA ACA GAG TTC ACN NNG TTT GTA ATC CCG TTA A
Plate11	A10	WSN-rev-mut395	TTC TCG ATA ACA GAG TTN NNC TTG TTT GTA ATC CCG T
Plate11	A11	WSN-rev-mut396	ATT TTC TCG ATA ACA GAN NNC ACC TTG TTT GTA ATC C
Plate11	A12	WSN-rev-mut397	TTC ATT TTC TCG ATA ACN NNG TTC ACC TTG TTT GTA A
Plate11	B01	WSN-rev-mut398	GTG TTC ATT TTC TCG ATN NNA GAG TTC ACC TTG TTT G
Plate11	B02	WSN-rev-mut399	TGA GTG TTC ATT TTC TCN NNA ACA GAG TTC ACC TTG T
Plate11	B03	WSN-rev-mut400	AAT TGA GTG TTC ATT TTN NNG ATA ACA GAG TTC ACC T
Plate11	B04	WSN-rev-mut401	GTG AAT TGA GTG TTC ATN NNC TCG ATA ACA GAG TTC A
Plate11	B05	WSN-rev-mut402	GCT GTG AAT TGA GTG TTN NNT TTC TCG ATA ACA GAG T
Plate11	B06	WSN-rev-mut403	ACA GCT GTG AAT TGA GTN NNC ATT TTC TCG ATA ACA G
Plate11	B07	WSN-rev-mut404	CCC ACA GCT GTG AAT TGN NNG TTC ATT TTC TCG ATA A
Plate11	B08	WSN-rev-mut405	TTA CCC ACA GCT GTG AAN NNA GTG TTC ATT TTC TCG A
Plate11	B09	WSN-rev-mut406	TCT TTA CCC ACA GCT GTN NNT TGA GTG TTC ATT TTC T
Plate11	B10	WSN-rev-mut407	AAT TCT TTA CCC ACA GCN NNG AAT TGA GTG TTC ATT T
Plate11	B11	WSN-rev-mut408	TTG AAT TCT TTA CCC ACN NNT GTG AAT TGA GTG TTC A
Plate11	B12	WSN-rev-mut409	TTG TTG AAT TCT TTA CCN NNA GCT GTG AAT TGA GTG T
Plate11	C01	WSN-rev-mut410	AAG TTG TTG AAT TCT TTN NNC ACA GCT GTG AAT TGA G
Plate11	C02	WSN-rev-mut411	TCT AAG TTG TTG AAT TCN NNA CCC ACA GCT GTG AAT T
Plate11	C03	WSN-rev-mut412	TTT TCT AAG TTG TTG AAN NNT TTA CCC ACA GCT GTG A
Plate11	C04	WSN-rev-mut413	CTT TTT TCT AAG TTG TTN NNT TCT TTA CCC ACA GCT G
Plate11	C05	WSN-rev-mut414	ATC CTT TTT TCT AAG TTN NNG AAT TCT TTA CCC ACA G
Plate11	C06	WSN-rev-mut415	TCC ATC CTT TTT TCT AAN NNG TTG AAT TCT TTA CCC A
Plate11	C07	WSN-rev-mut416	TTT TCC ATC CTT TTT TCN NNG TTG TTG AAT TCT TTA C
Plate11	C08	WSN-rev-mut417	AAA TTT TCC ATC CTT TTN NNT AAG TTG TTG AAT TCT T
Plate11	C09	WSN-rev-mut418	TTT AAA TTT TCC ATC CTN NNT TCT AAG TTG TTG AAT T
Plate11	C10	WSN-rev-mut419	TTA TTT AAA TTT TCC ATN NNT TTT TCT AAG TTG TTG A
Plate11	C11	WSN-rev-mut420	TTT TTA TTT AAA TTT TCN NNC CTT TTT TCT AAG TTG T
Plate11	C12	WSN-rev-mut421	ACT TTT TTA TTT AAA TTN NNC ATC CTT TTT TCT AAG T
Plate11	D01	WSN-rev-mut422	TCA ACT TTT TTA TTT AAN NNT TCC ATC CTT TTT TCT A
Plate11	D02	WSN-rev-mut423	TCA TCA ACT TTT TTA TTN NNA TTT TCC ATC CTT TTT T
Plate11	D03	WSN-rev-mut424	CCA TCA TCA ACT TTT TTN NNT AAA TTT TCC ATC CTT T
Plate11	D04	WSN-rev-mut425	AAC CCA TCA TCA ACT TTN NNA TTT AAA TTT TCC ATC C
Plate11	D05	WSN-rev-mut426	AGA AAC CCA TCA TCA ACN NNT TTA TTT AAA TTT TCC A
Plate11	D06	WSN-rev-mut427	TCC AGA AAC CCA TCA TCN NNT TTT TTA TTT AAA TTT T
Plate11	D07	WSN-rev-mut428	ATG TCC AGA AAC CCA TCN NNA ACT TTT TTA TTT AAA T
Plate11	D08	WSN-rev-mut429	CAA ATG TCC AGA AAC CCN NNA TCA ACT TTT TTA TTT A
Plate11	D09	WSN-rev-mut430	GTC CAA ATG TCC AGA AAN NNA TCA TCA ACT TTT TTA T
Plate11	D10	WSN-rev-mut431	TAT GTC CAA ATG TCC AGN NNC CCA TCA TCA ACT TTT T
Plate11	D11	WSN-rev-mut432	TTA TAT GTC CAA ATG TCN NNA AAC CCA TCA TCA ACT T
Plate11	D12	WSN-rev-mut433	GCA TTA TAT GTC CAA ATN NNC AGA AAC CCA TCA TCA A
Plate11	E01	WSN-rev-mut434	TCT GCA TTA TAT GTC CAN NNG TCC AGA AAC CCA TCA T
Plate11	E02	WSN-rev-mut435	AAT TCT GCA TTA TAT GTN NNA ATG TCC AGA AAC CCA T
Plate11	E03	WSN-rev-mut436	AAC AAT TCT GCA TTA TAN NNC CAA ATG TCC AGA AAC C
Plate11	E04	WSN-rev-mut437	ACT AAC AAT TCT GCA TTN NNT GTC CAA ATG TCC AGA A
Plate11	E05	WSN-rev-mut438	AGA ACT AAC AAT TCT GCN NNA TAT GTC CAA ATG TCC A
Plate11	E06	WSN-rev-mut439	AGT AGA ACT AAC AAT TCN NNA TTA TAT GTC CAA ATG T
Plate11	E07	WSN-rev-mut440	TCC AGT AGA ACT AAC AAN NNT GCA TTA TAT GTC CAA A
Plate11	E08	WSN-rev-mut441	TTT TCC AGT AGA ACT AAN NNT TCT GCA TTA TAT GTC C
Plate11	E09	WSN-rev-mut442	TCA TTT TCC AGT AGA ACN NNC AAT TCT GCA TTA TAT G
Plate11	E10	WSN-rev-mut443	CTT TCA TTT TCC AGT AGN NNT AAC AAT TCT GCA TTA T
Plate11	E11	WSN-rev-mut444	GTC CTT TCA TTT TCC AGN NNA ACT AAC AAT TCT GCA T
Plate11	E12	WSN-rev-mut445	AAA GTC CTT TCA TTT TCN NNT AGA ACT AAC AAT TCT G
Plate11	F01	WSN-rev-mut446	TCC AAA GTC CTT TCA TTN NNC AGT AGA ACT AAC AAT T
Plate11	F02	WSN-rev-mut447	AAA TCC AAA GTC CTT TCN NNT TCC AGT AGA ACT AAC A
Plate11	F03	WSN-rev-mut448	TGG AAA TCC AAA GTC CTN NNA TTT TCC AGT AGA ACT A
Plate11	F04	WSN-rev-mut449	TCA TGG AAA TCC AAA GTN NNT TCA TTT TCC AGT AGA A
Plate11	F05	WSN-rev-mut450	AAG TCA TGG AAA TCC AAN NNC CTT TCA TTT TCC AGT A
Plate11	F06	WSN-rev-mut451	TTT AAG TCA TGG AAA TCN NNA GTC CTT TCA TTT TCC A
Plate11	F07	WSN-rev-mut452	ACA TTT AAG TCA TGG AAN NNC AAA GTC CTT TCA TTT T
Plate11	F08	WSN-rev-mut453	TTC ACA TTT AAG TCA TGN NNA TCC AAA GTC CTT TCA T
Plate11	F09	WSN-rev-mut454	TTC TTC ACA TTT AAG TCN NNG AAA TCC AAA GTC CTT T
Plate11	F10	WSN-rev-mut455	AGA TTC TTC ACA TTT AAN NNA TGG AAA TCC AAA GTC C
Plate11	F11	WSN-rev-mut456	TAC AGA TTC TTC ACA TTN NNG TCA TGG AAA TCC AAA G
Plate11	F12	WSN-rev-mut457	TCG TAC AGA TTC TTC ACN NNT AAG TCA TGG AAA TCC A
Plate11	G01	WSN-rev-mut458	TTC TCG TAC AGA TTC TTN NNA TTT AAG TCA TGG AAA T
Plate11	G02	WSN-rev-mut459	ACT TTC TCG TAC AGA TTN NNC ACA TTT AAG TCA TGG A
Plate11	G03	WSN-rev-mut460	TTT ACT TTC TCG TAC AGN NNC TTC ACA TTT AAG TCA T
Plate11	G04	WSN-rev-mut461	CTT TTT ACT TTC TCG TAN NNA TTC TTC ACA TTT AAG T
Plate11	G05	WSN-rev-mut462	TGG CTT TTT ACT TTC TCN NNC AGA TTC TTC ACA TTT A
Plate11	G06	WSN-rev-mut463	AAT TGG CTT TTT ACT TTN NNG TAC AGA TTC TTC ACA T
Plate11	G07	WSN-rev-mut464	TTT AAT TGG CTT TTT ACN NNC TCG TAC AGA TTC TTC A
Plate11	G08	WSN-rev-mut465	TTC TTT AAT TGG CTT TTN NNT TTC TCG TAC AGA TTC T
Plate11	G09	WSN-rev-mut466	TTA TTC TTT AAT TGG CTN NNT ACT TTC TCG TAC AGA T
Plate11	G10	WSN-rev-mut467	GCA TTA TTC TTT AAT TGN NNT TTT ACT TTC TCG TAC A
Plate11	G11	WSN-rev-mut468	TTG GCA TTA TTC TTT AAN NNG CTT TTT ACT TTC TCG T
Plate11	G12	WSN-rev-mut469	TCT TTG GCA TTA TTC TTN NNT TGG CTT TTT ACT TTC T
Plate11	H01	WSN-rev-mut470	ATT TCT TTG GCA TTA TTN NNT AAT TGG CTT TTT ACT T
Plate11	H02	WSN-rev-mut471	CCG ATT TCT TTG GCA TTN NNC TTT AAT TGG CTT TTT A
Plate11	H03	WSN-rev-mut472	TTT CCG ATT TCT TTG GCN NNA TTC TTT AAT TGG CTT T
Plate11	H04	WSN-rev-mut473	CCA TTT CCG ATT TCT TTN NNA TTA TTC TTT AAT TGG C
Plate11	H05	WSN-rev-mut474	CAC CCA TTT CCG ATT TCN NNG GCA TTA TTC TTT AAT T
Plate11	H06	WSN-rev-mut475	AAA CAC CCA TTT CCG ATN NNT TTG GCA TTA TTC TTT A
Plate11	H07	WSN-rev-mut476	TCA AAA CAC CCA TTT CCN NNT TCT TTG GCA TTA TTC T
Plate11	H08	WSN-rev-mut477	AAC TCA AAA CAC CCA TTN NNG ATT TCT TTG GCA TTA T
Plate11	H09	WSN-rev-mut478	TAG AAC TCA AAA CAC CCN NNT CCG ATT TCT TTG GCA T
Plate11	H10	WSN-rev-mut479	TGG TAG AAC TCA AAA CAN NNA TTT CCG ATT TCT TTG G
Plate11	H11	WSN-rev-mut480	TTG TGG TAG AAC TCA AAN NNC CCA TTT CCG ATT TCT T
Plate11	H12	WSN-rev-mut481	CAC TTG TGG TAG AAC TCN NNA CAC CCA TTT CCG ATT T
Plate12	A01	WSN-rev-mut482	TCA CAC TTG TGG TAG AAN NNA AAA CAC CCA TTT CCG A
Plate12	A02	WSN-rev-mut483	TTG TCA CAC TTG TGG TAN NNC TCA AAA CAC CCA TTT C
Plate12	A03	WSN-rev-mut484	TCA TTG TCA CAC TTG TGN NNG AAC TCA AAA CAC CCA T
Plate12	A04	WSN-rev-mut485	CAT TCA TTG TCA CAC TTN NNG TAG AAC TCA AAA CAC C
Plate12	A05	WSN-rev-mut486	ATG CAT TCA TTG TCA CAN NNG TGG TAG AAC TCA AAA C
Plate12	A06	WSN-rev-mut487	TCC ATG CAT TCA TTG TCN NNC TTG TGG TAG AAC TCA A
Plate12	A07	WSN-rev-mut488	CTT TCC ATG CAT TCA TTN NNA CAC TTG TGG TAG AAC T
Plate12	A08	WSN-rev-mut489	ACA CTT TCC ATG CAT TCN NNG TCA CAC TTG TGG TAG A
Plate12	A09	WSN-rev-mut490	CTT ACA CTT TCC ATG CAN NNA TTG TCA CAC TTG TGG T
Plate12	A10	WSN-rev-mut491	TTT CTT ACA CTT TCC ATN NNT TCA TTG TCA CAC TTG T
Plate12	A11	WSN-rev-mut492	CCA TTT CTT ACA CTT TCN NNG CAT TCA TTG TCA CAC T
Plate12	A12	WSN-rev-mut493	GTC CCA TTT CTT ACA CTN NNC ATG CAT TCA TTG TCA C
Plate12	B01	WSN-rev-mut494	TAA GTC CCA TTT CTT ACN NNT TCC ATG CAT TCA TTG T
Plate12	B02	WSN-rev-mut495	TCA TAA GTC CCA TTT CTN NNA CTT TCC ATG CAT TCA T
Plate12	B03	WSN-rev-mut496	TAA TCA TAA GTC CCA TTN NNT ACA CTT TCC ATG CAT T
Plate12	B04	WSN-rev-mut497	GGA TAA TCA TAA GTC CCN NNT CTT ACA CTT TCC ATG C
Plate12	B05	WSN-rev-mut498	TTT GGA TAA TCA TAA GTN NNA TTT CTT ACA CTT TCC A
Plate12	B06	WSN-rev-mut499	TAT TTT GGA TAA TCA TAN NNC CCA TTT CTT ACA CTT T
Plate12	B07	WSN-rev-mut500	GAA TAT TTT GGA TAA TCN NNA GTC CCA TTT CTT ACA C
Plate12	B08	WSN-rev-mut501	TCT GAA TAT TTT GGA TAN NNA TAA GTC CCA TTT CTT A
Plate12	B09	WSN-rev-mut502	TCT TCT GAA TAT TTT GGN NNA TCA TAA GTC CCA TTT C
Plate12	B10	WSN-rev-mut503	GAT TCT TCT GAA TAT TTN NNA TAA TCA TAA GTC CCA T
Plate12	B11	WSN-rev-mut504	TTT GAT TCT TCT GAA TAN NNT GGA TAA TCA TAA GTC C
Plate12	B12	WSN-rev-mut505	AAC TTT GAT TCT TCT GAN NNT TTT GGA TAA TCA TAA G
Plate12	C01	WSN-rev-mut506	TTC AAC TTT GAT TCT TCN NNA TAT TTT GGA TAA TCA T
Plate12	C02	WSN-rev-mut507	CTG TTC AAC TTT GAT TCN NNT GAA TAT TTT GGA TAA T
Plate12	C03	WSN-rev-mut508	TCC CTG TTC AAC TTT GAN NNT TCT GAA TAT TTT GGA T
Plate12	C04	WSN-rev-mut509	TTT TCC CTG TTC AAC TTN NNT TCT TCT GAA TAT TTT G
Plate12	C05	WSN-rev-mut510	ATC TTT TCC CTG TTC AAN NNT GAT TCT TCT GAA TAT T
Plate12	C06	WSN-rev-mut511	TCT ATC TTT TCC CTG TTN NNC TTT GAT TCT TCT GAA T
Plate12	C07	WSN-rev-mut512	CCA TCT ATC TTT TCC CTN NNC AAC TTT GAT TCT TCT G
Plate12	C08	WSN-rev-mut513	ACT CCA TCT ATC TTT TCN NNG TTC AAC TTT GAT TCT T
Plate12	C09	WSN-rev-mut514	TTC ACT CCA TCT ATC TTN NNC CTG TTC AAC TTT GAT T
Plate12	C10	WSN-rev-mut515	AAT TTC ACT CCA TCT ATN NNT TCC CTG TTC AAC TTT G
Plate12	C11	WSN-rev-mut516	TCC AAT TTC ACT CCA TCN NNC TTT TCC CTG TTC AAC T
Plate12	C12	WSN-rev-mut517	GAT TCC AAT TTC ACT CCN NNT ATC TTT TCC CTG TTC A
Plate12	D01	WSN-rev-mut518	ATT GAT TCC AAT TTC ACN NNA TCT ATC TTT TCC CTG T
Plate12	D02	WSN-rev-mut519	CCC ATT GAT TCC AAT TTN NNT CCA TCT ATC TTT TCC C
Plate12	D03	WSN-rev-mut520	ACC CCC ATT GAT TCC AAN NNC ACT CCA TCT ATC TTT T
Plate12	D04	WSN-rev-mut521	TAC ACC CCC ATT GAT TCN NNT TTC ACT CCA TCT ATC T
Plate12	D05	WSN-rev-mut522	TGA TAC ACC CCC ATT GAN NNC AAT TTC ACT CCA TCT A
Plate12	D06	WSN-rev-mut523	ATC TGA TAC ACC CCC ATN NNT TCC AAT TTC ACT CCA T
Plate12	D07	WSN-rev-mut524	AGA ATC TGA TAC ACC CCN NNT GAT TCC AAT TTC ACT C
Plate12	D08	WSN-rev-mut525	GCC AGA ATC TGA TAC ACN NNC ATT GAT TCC AAT TTC A
Plate12	D09	WSN-rev-mut526	ATC GCC AGA ATC TGA TAN NNC CCC ATT GAT TCC AAT T
Plate12	D10	WSN-rev-mut527	TAG ATC GCC AGA ATC TGN NNC ACC CCC ATT GAT TCC A
Plate12	D11	WSN-rev-mut528	GAG TAG ATC GCC AGA ATN NNA TAC ACC CCC ATT GAT T
Plate12	D12	WSN-rev-mut529	GTT GAG TAG ATC GCC AGN NNC TGA TAC ACC CCC ATT G
Plate12	E01	WSN-rev-mut530	ACA GTT GAG TAG ATC GCN NNA ATC TGA TAC ACC CCC A
Plate12	E02	WSN-rev-mut531	GCG ACA GTT GAG TAG ATN NNC AGA ATC TGA TAC ACC C
Plate12	E03	WSN-rev-mut532	CTG GCG ACA GTT GAG TAN NNC GCC AGA ATC TGA TAC A
Plate12	E04	WSN-rev-mut533	GAA CTG GCG ACA GTT GAN NNG ATC GCC AGA ATC TGA T
Plate12	E05	WSN-rev-mut534	AGT GAA CTG GCG ACA GTN NNG TAG ATC GCC AGA ATC T
Plate12	E06	WSN-rev-mut535	ACC AGT GAA CTG GCG ACN NNT GAG TAG ATC GCC AGA A
Plate12	E07	WSN-rev-mut536	AGC ACC AGT GAA CTG GCN NNA GTT GAG TAG ATC GCC A
Plate12	E08	WSN-rev-mut537	AAA AGC ACC AGT GAA CTN NNG ACA GTT GAG TAG ATC G
Plate12	E09	WSN-rev-mut538	ACC AAA AGC ACC AGT GAN NNG GCG ACA GTT GAG TAG A
Plate12	E10	WSN-rev-mut539	GAG ACC AAA AGC ACC AGN NNA CTG GCG ACA GTT GAG T
Plate12	E11	WSN-rev-mut540	AGG GAG ACC AAA AGC ACN NNT GAA CTG GCG ACA GTT G
Plate12	E12	WSN-rev-mut541	CCC AGG GAG ACC AAA AGN NNC AGT GAA CTG GCG ACA G
Plate12	F01	WSN-rev-mut542	GCC CCC AGG GAG ACC AAN NNC ACC AGT GAA CTG GCG A
Plate12	F02	WSN-rev-mut543	ATT GCC CCC AGG GAG ACN NNA AGC ACC AGT GAA CTG G
Plate12	F03	WSN-rev-mut544	CTG ATT GCC CCC AGG GAN NNC AAA AGC ACC AGT GAA C
Plate12	F04	WSN-rev-mut545	AAA CTG ATT GCC CCC AGN NNG ACC AAA AGC ACC AGT G
Plate12	F05	WSN-rev-mut546	CAG AAA CTG ATT GCC CCN NNG GAG ACC AAA AGC ACC A
Plate12	F06	WSN-rev-mut547	ATC CAG AAA CTG ATT GCN NNC AGG GAG ACC AAA AGC A
Plate12	F07	WSN-rev-mut548	CAC ATC CAG AAA CTG ATN NNC CCC AGG GAG ACC AAA A
Plate12	F08	WSN-rev-mut549	GAA CAC ATC CAG AAA CTN NNT GCC CCC AGG GAG ACC A
Plate12	F09	WSN-rev-mut550	TTA GAA CAC ATC CAG AAN NNG ATT GCC CCC AGG GAG A
Plate12	F10	WSN-rev-mut551	CCA TTA GAA CAC ATC CAN NNA CTG ATT GCC CCC AGG G
Plate12	F11	WSN-rev-mut552	GAC CCA TTA GAA CAC ATN NNG AAA CTG ATT GCC CCC A
Plate12	F12	WSN-rev-mut553	AAA GAC CCA TTA GAA CAN NNC CAG AAA CTG ATT GCC C
Plate12	G01	WSN-rev-mut554	TGC AAA GAC CCA TTA GAN NNC ATC CAG AAA CTG ATT G
Plate12	G02	WSN-rev-mut555	CAC TGC AAA GAC CCA TTN NNA CAC ATC CAG AAA CTG A
Plate12	G03	WSN-rev-mut556	CTG CAC TGC AAA GAC CCN NNA GAA CAC ATC CAG AAA C
Plate12	G04	WSN-rev-mut557	ATT CTG CAC TGC AAA GAN NNA TTA GAA CAC ATC CAG A
Plate12	G05	WSN-rev-mut558	CAT ATT CTG CAC TGC AAN NNC CCA TTA GAA CAC ATC C
Plate12	G06	WSN-rev-mut559	ATG CAT ATT CTG CAC TGN NNA GAC CCA TTA GAA CAC A
Plate12	G07	WSN-rev-mut560	CAG ATG CAT ATT CTG CAN NNC AAA GAC CCA TTA GAA C
Plate12	G08	WSN-rev-mut561	TCT CAG ATG CAT ATT CTN NNC TGC AAA GAC CCA TTA G
Plate12	G09	WSN-rev-mut562	TAA TCT CAG ATG CAT ATN NNG CAC TGC AAA GAC CCA T
Plate12	G10	WSN-rev-mut563	TCC TAA TCT CAG ATG CAN NNT CTG CAC TGC AAA GAC C
Plate12	G11	WSN-rev-mut564	AAA TCC TAA TCT CAG ATN NNT ATT CTG CAC TGC AAA G
Plate12	G12	WSN-rev-mut565	CTG AAA TCC TAA TCT CAN NNG CAT ATT CTG CAC TGC A
Plate2	A01	WSN-for-mut98	CAT GGT CCT ACA TTG TAN NNA CAC CAA ACT CTG AGA A
Plate2	A02	WSN-for-mut99	GGT CCT ACA TTG TAG AAN NNC CAA ACT CTG AGA ATG G
Plate2	A03	WSN-for-mut100	CCT ACA TTG TAG AAA CAN NNA ACT CTG AGA ATG GAG C
Plate2	A04	WSN-for-mut101	ACA TTG TAG AAA CAC CAN NNT CTG AGA ATG GAG CAT G
Plate2	A05	WSN-for-mut102	TTG TAG AAA CAC CAA ACN NNG AGA ATG GAG CAT GTT A
Plate2	A06	WSN-for-mut103	TAG AAA CAC CAA ACT CTN NNA ATG GAG CAT GTT ATC C
Plate2	A07	WSN-for-mut104	AAA CAC CAA ACT CTG AGN NNG GAG CAT GTT ATC CAG G
Plate2	A08	WSN-for-mut105	CAC CAA ACT CTG AGA ATN NNG CAT GTT ATC CAG GAG A
Plate2	A09	WSN-for-mut106	CAA ACT CTG AGA ATG GAN NNT GTT ATC CAG GAG ATC T
Plate2	A10	WSN-for-mut107	ACT CTG AGA ATG GAG CAN NNT ATC CAG GAG ATC TCA T
Plate2	A11	WSN-for-mut108	CTG AGA ATG GAG CAT GTN NNC CAG GAG ATC TCA TCG A
Plate2	A12	WSN-for-mut109	AGA ATG GAG CAT GTT ATN NNG GAG ATC TCA TCG ACT A
Plate2	B01	WSN-for-mut110	ATG GAG CAT GTT ATC CAN NNG ATC TCA TCG ACT ATG A
Plate2	B02	WSN-for-mut111	GAG CAT GTT ATC CAG GAN NNC TCA TCG ACT ATG AGG A
Plate2	B03	WSN-for-mut112	CAT GTT ATC CAG GAG ATN NNA TCG ACT ATG AGG AAC T
Plate2	B04	WSN-for-mut113	GTT ATC CAG GAG ATC TCN NNG ACT ATG AGG AAC TGA G
Plate2	B05	WSN-for-mut114	ATC CAG GAG ATC TCA TCN NNT ATG AGG AAC TGA GGG A
Plate2	B06	WSN-for-mut115	CAG GAG ATC TCA TCG ACN NNG AGG AAC TGA GGG AGC A
Plate2	B07	WSN-for-mut116	GAG ATC TCA TCG ACT ATN NNG AAC TGA GGG AGC AAT T
Plate2	B08	WSN-for-mut117	ATC TCA TCG ACT ATG AGN NNC TGA GGG AGC AAT TGA G
Plate2	B09	WSN-for-mut118	TCA TCG ACT ATG AGG AAN NNA GGG AGC AAT TGA GCT C
Plate2	B10	WSN-for-mut119	TCG ACT ATG AGG AAC TGN NNG AGC AAT TGA GCT CAG T
Plate2	B11	WSN-for-mut120	ACT ATG AGG AAC TGA GGN NNC AAT TGA GCT CAG TAT C
Plate2	B12	WSN-for-mut121	ATG AGG AAC TGA GGG AGN NNT TGA GCT CAG TAT CAT C
Plate2	C01	WSN-for-mut122	AGG AAC TGA GGG AGC AAN NNA GCT CAG TAT CAT CAT T
Plate2	C02	WSN-for-mut123	AAC TGA GGG AGC AAT TGN NNT CAG TAT CAT CAT TAG A
Plate2	C03	WSN-for-mut124	TGA GGG AGC AAT TGA GCN NNG TAT CAT CAT TAG AAA G
Plate2	C04	WSN-for-mut125	GGG AGC AAT TGA GCT CAN NNT CAT CAT TAG AAA GAT T
Plate2	C05	WSN-for-mut126	AGC AAT TGA GCT CAG TAN NNT CAT TAG AAA GAT TCG A
Plate2	C06	WSN-for-mut127	AAT TGA GCT CAG TAT CAN NNT TAG AAA GAT TCG AAA T
Plate2	C07	WSN-for-mut128	TGA GCT CAG TAT CAT CAN NNG AAA GAT TCG AAA TAT T
Plate2	C08	WSN-for-mut129	GCT CAG TAT CAT CAT TAN NNA GAT TCG AAA TAT TTC C
Plate2	C09	WSN-for-mut130	CAG TAT CAT CAT TAG AAN NNT TCG AAA TAT TTC CCA A
Plate2	C10	WSN-for-mut131	TAT CAT CAT TAG AAA GAN NNG AAA TAT TTC CCA AGG A
Plate2	C11	WSN-for-mut132	CAT CAT TAG AAA GAT TCN NNA TAT TTC CCA AGG AAA G
Plate2	C12	WSN-for-mut133	CAT TAG AAA GAT TCG AAN NNT TTC CCA AGG AAA GTT C
Plate2	D01	WSN-for-mut134	TAG AAA GAT TCG AAA TAN NNC CCA AGG AAA GTT CAT G
Plate2	D02	WSN-for-mut135	AAA GAT TCG AAA TAT TTN NNA AGG AAA GTT CAT GGC C
Plate2	D03	WSN-for-mut136	GAT TCG AAA TAT TTC CCN NNG AAA GTT CAT GGC CCA A
Plate2	D04	WSN-for-mut137	TCG AAA TAT TTC CCA AGN NNA GTT CAT GGC CCA ACC A
Plate2	D05	WSN-for-mut138	AAA TAT TTC CCA AGG AAN NNT CAT GGC CCA ACC ACA C
Plate2	D06	WSN-for-mut139	TAT TTC CCA AGG AAA GTN NNT GGC CCA ACC ACA CAT T
Plate2	D07	WSN-for-mut140	TTC CCA AGG AAA GTT CAN NNC CCA ACC ACA CAT TCA A
Plate2	D08	WSN-for-mut141	CCA AGG AAA GTT CAT GGN NNA ACC ACA CAT TCA ACG G
Plate2	D09	WSN-for-mut142	AGG AAA GTT CAT GGC CCN NNC ACA CAT TCA ACG GAG T
Plate2	D10	WSN-for-mut143	AAA GTT CAT GGC CCA ACN NNA CAT TCA ACG GAG TAA C
Plate2	D11	WSN-for-mut144	GTT CAT GGC CCA ACC ACN NNT TCA ACG GAG TAA CAG T
Plate2	D12	WSN-for-mut145	CAT GGC CCA ACC ACA CAN NNA ACG GAG TAA CAG TAT C
Plate2	E01	WSN-for-mut146	GGC CCA ACC ACA CAT TCN NNG GAG TAA CAG TAT CAT G
Plate2	E02	WSN-for-mut147	CCA ACC ACA CAT TCA ACN NNG TAA CAG TAT CAT GCT C
Plate2	E03	WSN-for-mut148	ACC ACA CAT TCA ACG GAN NNA CAG TAT CAT GCT CCC A
Plate2	E04	WSN-for-mut149	ACA CAT TCA ACG GAG TAN NNG TAT CAT GCT CCC ATA G
Plate2	E05	WSN-for-mut150	CAT TCA ACG GAG TAA CAN NNT CAT GCT CCC ATA GGG G
Plate2	E06	WSN-for-mut151	TCA ACG GAG TAA CAG TAN NNT GCT CCC ATA GGG GAA A
Plate2	E07	WSN-for-mut152	ACG GAG TAA CAG TAT CAN NNT CCC ATA GGG GAA AAA G
Plate2	E08	WSN-for-mut153	GAG TAA CAG TAT CAT GCN NNC ATA GGG GAA AAA GCA G
Plate2	E09	WSN-for-mut154	TAA CAG TAT CAT GCT CCN NNA GGG GAA AAA GCA GTT T
Plate2	E10	WSN-for-mut155	CAG TAT CAT GCT CCC ATN NNG GAA AAA GCA GTT TTT A
Plate2	E11	WSN-for-mut156	TAT CAT GCT CCC ATA GGN NNA AAA GCA GTT TTT ACA G
Plate2	E12	WSN-for-mut157	CAT GCT CCC ATA GGG GAN NNA GCA GTT TTT ACA GAA A
Plate2	F01	WSN-for-mut158	GCT CCC ATA GGG GAA AAN NNA GTT TTT ACA GAA ATT T
Plate2	F02	WSN-for-mut159	CCC ATA GGG GAA AAA GCN NNT TTT ACA GAA ATT TGC T
Plate2	F03	WSN-for-mut160	ATA GGG GAA AAA GCA GTN NNT ACA GAA ATT TGC TAT G
Plate2	F04	WSN-for-mut161	GGG GAA AAA GCA GTT TTN NNA GAA ATT TGC TAT GGC T
Plate2	F05	WSN-for-mut162	GAA AAA GCA GTT TTT ACN NNA ATT TGC TAT GGC TGA C
Plate2	F06	WSN-for-mut163	AAA GCA GTT TTT ACA GAN NNT TGC TAT GGC TGA CGA A
Plate2	F07	WSN-for-mut164	GCA GTT TTT ACA GAA ATN NNC TAT GGC TGA CGA AGA A
Plate2	F08	WSN-for-mut165	GTT TTT ACA GAA ATT TGN NNT GGC TGA CGA AGA AGG G
Plate2	F09	WSN-for-mut166	TTT ACA GAA ATT TGC TAN NNC TGA CGA AGA AGG GGG A
Plate2	F10	WSN-for-mut167	ACA GAA ATT TGC TAT GGN NNA CGA AGA AGG GGG ATT C
Plate2	F11	WSN-for-mut168	GAA ATT TGC TAT GGC TGN NNA AGA AGG GGG ATT CAT A
Plate2	F12	WSN-for-mut169	ATT TGC TAT GGC TGA CGN NNA AGG GGG ATT CAT ACC C
Plate2	G01	WSN-for-mut170	TGC TAT GGC TGA CGA AGN NNG GGG ATT CAT ACC CAA A
Plate2	G02	WSN-for-mut171	TAT GGC TGA CGA AGA AGN NNG ATT CAT ACC CAA AGC T
Plate2	G03	WSN-for-mut172	GGC TGA CGA AGA AGG GGN NNT CAT ACC CAA AGC TGA C
Plate2	G04	WSN-for-mut173	TGA CGA AGA AGG GGG ATN NNT ACC CAA AGC TGA CCA A
Plate2	G05	WSN-for-mut174	CGA AGA AGG GGG ATT CAN NNC CAA AGC TGA CCA ATT C
Plate2	G06	WSN-for-mut175	AGA AGG GGG ATT CAT ACN NNA AGC TGA CCA ATT CCT A
Plate2	G07	WSN-for-mut176	AGG GGG ATT CAT ACC CAN NNC TGA CCA ATT CCT ATG T
Plate2	G08	WSN-for-mut177	GGG ATT CAT ACC CAA AGN NNA CCA ATT CCT ATG TGA A
Plate2	G09	WSN-for-mut178	ATT CAT ACC CAA AGC TGN NNA ATT CCT ATG TGA ACA A
Plate2	G10	WSN-for-mut179	CAT ACC CAA AGC TGA CCN NNT CCT ATG TGA ACA ATA A
Plate2	G11	WSN-for-mut180	ACC CAA AGC TGA CCA ATN NNT ATG TGA ACA ATA AAG G
Plate2	G12	WSN-for-mut181	CAA AGC TGA CCA ATT CCN NNG TGA ACA ATA AAG GGA A
Plate2	H01	WSN-for-mut182	AGC TGA CCA ATT CCT ATN NNA ACA ATA AAG GGA AAG A
Plate2	H02	WSN-for-mut183	TGA CCA ATT CCT ATG TGN NNA ATA AAG GGA AAG AAG T
Plate2	H03	WSN-for-mut184	CCA ATT CCT ATG TGA ACN NNA AAG GGA AAG AAG TCC T
Plate2	H04	WSN-for-mut185	ATT CCT ATG TGA ACA ATN NNG GGA AAG AAG TCC TTG T
Plate2	H05	WSN-for-mut186	CCT ATG TGA ACA ATA AAN NNA AAG AAG TCC TTG TAC T
Plate2	H06	WSN-for-mut187	ATG TGA ACA ATA AAG GGN NNG AAG TCC TTG TAC TAT G
Plate2	H07	WSN-for-mut188	TGA ACA ATA AAG GGA AAN NNG TCC TTG TAC TAT GGG G
Plate2	H08	WSN-for-mut189	ACA ATA AAG GGA AAG AAN NNC TTG TAC TAT GGG GTG T
Plate2	H09	WSN-for-mut190	ATA AAG GGA AAG AAG TCN NNG TAC TAT GGG GTG TTC A
Plate2	H10	WSN-for-mut191	AAG GGA AAG AAG TCC TTN NNC TAT GGG GTG TTC ATC A
Plate2	H11	WSN-for-mut192	GGA AAG AAG TCC TTG TAN NNT GGG GTG TTC ATC ACC C
Plate2	H12	WSN-for-mut193	AAG AAG TCC TTG TAC TAN NNG GTG TTC ATC ACC CGT C
Plate3	A01	WSN-for-mut194	AAG TCC TTG TAC TAT GGN NNG TTC ATC ACC CGT CTA G
Plate3	A02	WSN-for-mut195	TCC TTG TAC TAT GGG GTN NNC ATC ACC CGT CTA GCA G
Plate3	A03	WSN-for-mut196	TTG TAC TAT GGG GTG TTN NNC ACC CGT CTA GCA GTG A
Plate3	A04	WSN-for-mut197	TAC TAT GGG GTG TTC ATN NNC CGT CTA GCA GTG ATG A
Plate3	A05	WSN-for-mut198	TAT GGG GTG TTC ATC ACN NNT CTA GCA GTG ATG AGC A
Plate3	A06	WSN-for-mut199	GGG GTG TTC ATC ACC CGN NNA GCA GTG ATG AGC AAC A
Plate3	A07	WSN-for-mut200	GTG TTC ATC ACC CGT CTN NNA GTG ATG AGC AAC AGA G
Plate3	A08	WSN-for-mut201	TTC ATC ACC CGT CTA GCN NNG ATG AGC AAC AGA GTC T
Plate3	A09	WSN-for-mut202	ATC ACC CGT CTA GCA GTN NNG AGC AAC AGA GTC TCT A
Plate3	A10	WSN-for-mut203	ACC CGT CTA GCA GTG ATN NNC AAC AGA GTC TCT ATA G
Plate3	A11	WSN-for-mut204	CGT CTA GCA GTG ATG AGN NNC AGA GTC TCT ATA GTA A
Plate3	A12	WSN-for-mut205	CTA GCA GTG ATG AGC AAN NNA GTC TCT ATA GTA ATG G
Plate3	B01	WSN-for-mut206	GCA GTG ATG AGC AAC AGN NNC TCT ATA GTA ATG GAA A
Plate3	B02	WSN-for-mut207	GTG ATG AGC AAC AGA GTN NNT ATA GTA ATG GAA ATG C
Plate3	B03	WSN-for-mut208	ATG AGC AAC AGA GTC TCN NNA GTA ATG GAA ATG CTT A
Plate3	B04	WSN-for-mut209	AGC AAC AGA GTC TCT ATN NNA ATG GAA ATG CTT ATG T
Plate3	B05	WSN-for-mut210	AAC AGA GTC TCT ATA GTN NNG GAA ATG CTT ATG TCT C
Plate3	B06	WSN-for-mut211	AGA GTC TCT ATA GTA ATN NNA ATG CTT ATG TCT CTG T
Plate3	B07	WSN-for-mut212	GTC TCT ATA GTA ATG GAN NNG CTT ATG TCT CTG TAG C
Plate3	B08	WSN-for-mut213	TCT ATA GTA ATG GAA ATN NNT ATG TCT CTG TAG CGT C
Plate3	B09	WSN-for-mut214	ATA GTA ATG GAA ATG CTN NNG TCT CTG TAG CGT CTT C
Plate3	B10	WSN-for-mut215	GTA ATG GAA ATG CTT ATN NNT CTG TAG CGT CTT CAA A
Plate3	B11	WSN-for-mut216	ATG GAA ATG CTT ATG TCN NNG TAG CGT CTT CAA ATT A
Plate3	B12	WSN-for-mut217	GAA ATG CTT ATG TCT CTN NNG CGT CTT CAA ATT ATA A
Plate3	C01	WSN-for-mut218	ATG CTT ATG TCT CTG TAN NNT CTT CAA ATT ATA ACA G
Plate3	C02	WSN-for-mut219	CTT ATG TCT CTG TAG CGN NNT CAA ATT ATA ACA GGA G
Plate3	C03	WSN-for-mut220	ATG TCT CTG TAG CGT CTN NNA ATT ATA ACA GGA GAT T
Plate3	C04	WSN-for-mut221	TCT CTG TAG CGT CTT CAN NNT ATA ACA GGA GAT TCA C
Plate3	C05	WSN-for-mut222	CTG TAG CGT CTT CAA ATN NNA ACA GGA GAT TCA CCC C
Plate3	C06	WSN-for-mut223	TAG CGT CTT CAA ATT ATN NNA GGA GAT TCA CCC CGG A
Plate3	C07	WSN-for-mut224	CGT CTT CAA ATT ATA ACN NNA GAT TCA CCC CGG AAA T
Plate3	C08	WSN-for-mut225	CTT CAA ATT ATA ACA GGN NNT TCA CCC CGG AAA TAG C
Plate3	C09	WSN-for-mut226	CAA ATT ATA ACA GGA GAN NNA CCC CGG AAA TAG CTG C
Plate3	C10	WSN-for-mut227	ATT ATA ACA GGA GAT TCN NNC CGG AAA TAG CTG CAA G
Plate3	C11	WSN-for-mut228	ATA ACA GGA GAT TCA CCN NNG AAA TAG CTG CAA GGC C
Plate3	C12	WSN-for-mut229	ACA GGA GAT TCA CCC CGN NNA TAG CTG CAA GGC CCA A
Plate3	D01	WSN-for-mut230	GGA GAT TCA CCC CGG AAN NNG CTG CAA GGC CCA AAG T
Plate3	D02	WSN-for-mut231	GAT TCA CCC CGG AAA TAN NNG CAA GGC CCA AAG TAA G
Plate3	D03	WSN-for-mut232	TCA CCC CGG AAA TAG CTN NNA GGC CCA AAG TAA GAG A
Plate3	D04	WSN-for-mut233	CCC CGG AAA TAG CTG CAN NNC CCA AAG TAA GAG ATC A
Plate3	D05	WSN-for-mut234	CGG AAA TAG CTG CAA GGN NNA AAG TAA GAG ATC AAC A
Plate3	D06	WSN-for-mut235	AAA TAG CTG CAA GGC CCN NNG TAA GAG ATC AAC ATG G
Plate3	D07	WSN-for-mut236	TAG CTG CAA GGC CCA AAN NNA GAG ATC AAC ATG GGA G
Plate3	D08	WSN-for-mut237	CTG CAA GGC CCA AAG TAN NNG ATC AAC ATG GGA GGA T
Plate3	D09	WSN-for-mut238	CAA GGC CCA AAG TAA GAN NNC AAC ATG GGA GGA TGA A
Plate3	D10	WSN-for-mut239	GGC CCA AAG TAA GAG ATN NNC ATG GGA GGA TGA ACT A
Plate3	D11	WSN-for-mut240	CCA AAG TAA GAG ATC AAN NNG GGA GGA TGA ACT ATT A
Plate3	D12	WSN-for-mut241	AAG TAA GAG ATC AAC ATN NNA GGA TGA ACT ATT ACT G
Plate3	E01	WSN-for-mut242	TAA GAG ATC AAC ATG GGN NNA TGA ACT ATT ACT GGA C
Plate3	E02	WSN-for-mut243	GAG ATC AAC ATG GGA GGN NNA ACT ATT ACT GGA CCT T
Plate3	E03	WSN-for-mut244	ATC AAC ATG GGA GGA TGN NNT ATT ACT GGA CCT TGC T
Plate3	E04	WSN-for-mut245	AAC ATG GGA GGA TGA ACN NNT ACT GGA CCT TGC TAG A
Plate3	E05	WSN-for-mut246	ATG GGA GGA TGA ACT ATN NNT GGA CCT TGC TAG AAC C
Plate3	E06	WSN-for-mut247	GGA GGA TGA ACT ATT ACN NNA CCT TGC TAG AAC CCG G
Plate3	E07	WSN-for-mut248	GGA TGA ACT ATT ACT GGN NNT TGC TAG AAC CCG GAG A
Plate3	E08	WSN-for-mut249	TGA ACT ATT ACT GGA CCN NNC TAG AAC CCG GAG ACA C
Plate3	E09	WSN-for-mut250	ACT ATT ACT GGA CCT TGN NNG AAC CCG GAG ACA CAA T
Plate3	E10	WSN-for-mut251	ATT ACT GGA CCT TGC TAN NNC CCG GAG ACA CAA TAA T
Plate3	E11	WSN-for-mut252	ACT GGA CCT TGC TAG AAN NNG GAG ACA CAA TAA TAT T
Plate3	E12	WSN-for-mut253	GGA CCT TGC TAG AAC CCN NNG ACA CAA TAA TAT TTG A
Plate3	F01	WSN-for-mut254	CCT TGC TAG AAC CCG GAN NNA CAA TAA TAT TTG AGG C
Plate3	F02	WSN-for-mut255	TGC TAG AAC CCG GAG ACN NNA TAA TAT TTG AGG CAA C
Plate3	F03	WSN-for-mut256	TAG AAC CCG GAG ACA CAN NNA TAT TTG AGG CAA CTG G
Plate3	F04	WSN-for-mut257	AAC CCG GAG ACA CAA TAN NNT TTG AGG CAA CTG GTA A
Plate3	F05	WSN-for-mut258	CCG GAG ACA CAA TAA TAN NNG AGG CAA CTG GTA ATC T
Plate3	F06	WSN-for-mut259	GAG ACA CAA TAA TAT TTN NNG CAA CTG GTA ATC TAA T
Plate3	F07	WSN-for-mut260	ACA CAA TAA TAT TTG AGN NNA CTG GTA ATC TAA TAG C
Plate3	F08	WSN-for-mut261	CAA TAA TAT TTG AGG CAN NNG GTA ATC TAA TAG CAC C
Plate3	F09	WSN-for-mut262	TAA TAT TTG AGG CAA CTN NNA ATC TAA TAG CAC CAT G
Plate3	F10	WSN-for-mut263	TAT TTG AGG CAA CTG GTN NNC TAA TAG CAC CAT GGT A
Plate3	F11	WSN-for-mut264	TTG AGG CAA CTG GTA ATN NNA TAG CAC CAT GGT ATG C
Plate3	F12	WSN-for-mut265	AGG CAA CTG GTA ATC TAN NNG CAC CAT GGT ATG CTT T
Plate3	G01	WSN-for-mut266	CAA CTG GTA ATC TAA TAN NNC CAT GGT ATG CTT TCG C
Plate3	G02	WSN-for-mut267	CTG GTA ATC TAA TAG CAN NNT GGT ATG CTT TCG CAC T
Plate3	G03	WSN-for-mut268	GTA ATC TAA TAG CAC CAN NNT ATG CTT TCG CAC TGA G
Plate3	G04	WSN-for-mut269	ATC TAA TAG CAC CAT GGN NNG CTT TCG CAC TGA GTA G
Plate3	G05	WSN-for-mut270	TAA TAG CAC CAT GGT ATN NNT TCG CAC TGA GTA GAG G
Plate3	G06	WSN-for-mut271	TAG CAC CAT GGT ATG CTN NNG CAC TGA GTA GAG GGT T
Plate3	G07	WSN-for-mut272	CAC CAT GGT ATG CTT TCN NNC TGA GTA GAG GGT TTG A
Plate3	G08	WSN-for-mut273	CAT GGT ATG CTT TCG CAN NNA GTA GAG GGT TTG AGT C
Plate3	G09	WSN-for-mut274	GGT ATG CTT TCG CAC TGN NNA GAG GGT TTG AGT CCG G
Plate3	G10	WSN-for-mut275	ATG CTT TCG CAC TGA GTN NNG GGT TTG AGT CCG GCA T
Plate3	G11	WSN-for-mut276	CTT TCG CAC TGA GTA GAN NNT TTG AGT CCG GCA TCA T
Plate3	G12	WSN-for-mut277	TCG CAC TGA GTA GAG GGN NNG AGT CCG GCA TCA TCA C
Plate3	H01	WSN-for-mut278	CAC TGA GTA GAG GGT TTN NNT CCG GCA TCA TCA CCT C
Plate3	H02	WSN-for-mut279	TGA GTA GAG GGT TTG AGN NNG GCA TCA TCA CCT CAA A
Plate3	H03	WSN-for-mut280	GTA GAG GGT TTG AGT CCN NNA TCA TCA CCT CAA ACG C
Plate3	H04	WSN-for-mut281	GAG GGT TTG AGT CCG GCN NNA TCA CCT CAA ACG CGT C
Plate3	H05	WSN-for-mut282	GGT TTG AGT CCG GCA TCN NNA CCT CAA ACG CGT CAA T
Plate3	H06	WSN-for-mut283	TTG AGT CCG GCA TCA TCN NNT CAA ACG CGT CAA TGC A
Plate3	H07	WSN-for-mut284	AGT CCG GCA TCA TCA CCN NNA ACG CGT CAA TGC ATG A
Plate3	H08	WSN-for-mut285	CCG GCA TCA TCA CCT CAN NNG CGT CAA TGC ATG AGT G
Plate3	H09	WSN-for-mut286	GCA TCA TCA CCT CAA ACN NNT CAA TGC ATG AGT GTA A
Plate3	H10	WSN-for-mut287	TCA TCA CCT CAA ACG CGN NNA TGC ATG AGT GTA ACA C
Plate3	H11	WSN-for-mut288	TCA CCT CAA ACG CGT CAN NNC ATG AGT GTA ACA CGA A
Plate3	H12	WSN-for-mut289	CCT CAA ACG CGT CAA TGN NNG AGT GTA ACA CGA AGT G
Plate4	A01	WSN-for-mut290	CAA ACG CGT CAA TGC ATN NNT GTA ACA CGA AGT GTC A
Plate4	A02	WSN-for-mut291	ACG CGT CAA TGC ATG AGN NNA ACA CGA AGT GTC AAA C
Plate4	A03	WSN-for-mut292	CGT CAA TGC ATG AGT GTN NNA CGA AGT GTC AAA CAC C
Plate4	A04	WSN-for-mut293	CAA TGC ATG AGT GTA ACN NNA AGT GTC AAA CAC CCC A
Plate4	A05	WSN-for-mut294	TGC ATG AGT GTA ACA CGN NNT GTC AAA CAC CCC AGG G
Plate4	A06	WSN-for-mut295	ATG AGT GTA ACA CGA AGN NNC AAA CAC CCC AGG GAG C
Plate4	A07	WSN-for-mut296	AGT GTA ACA CGA AGT GTN NNA CAC CCC AGG GAG CTA T
Plate4	A08	WSN-for-mut297	GTA ACA CGA AGT GTC AAN NNC CCC AGG GAG CTA TAA A
Plate4	A09	WSN-for-mut298	ACA CGA AGT GTC AAA CAN NNC AGG GAG CTA TAA ACA G
Plate4	A10	WSN-for-mut299	CGA AGT GTC AAA CAC CCN NNG GAG CTA TAA ACA GCA A
Plate4	A11	WSN-for-mut300	AGT GTC AAA CAC CCC AGN NNG CTA TAA ACA GCA ATC T
Plate4	A12	WSN-for-mut301	GTC AAA CAC CCC AGG GAN NNA TAA ACA GCA ATC TCC C
Plate4	B01	WSN-for-mut302	AAA CAC CCC AGG GAG CTN NNA ACA GCA ATC TCC CTT T
Plate4	B02	WSN-for-mut303	CAC CCC AGG GAG CTA TAN NNA GCA ATC TCC CTT TCC A
Plate4	B03	WSN-for-mut304	CCC AGG GAG CTA TAA ACN NNA ATC TCC CTT TCC AGA A
Plate4	B04	WSN-for-mut305	AGG GAG CTA TAA ACA GCN NNC TCC CTT TCC AGA ATA T
Plate4	B05	WSN-for-mut306	GAG CTA TAA ACA GCA ATN NNC CTT TCC AGA ATA TAC A
Plate4	B06	WSN-for-mut307	CTA TAA ACA GCA ATC TCN NNT TCC AGA ATA TAC ACC C
Plate4	B07	WSN-for-mut308	TAA ACA GCA ATC TCC CTN NNC AGA ATA TAC ACC CAG T
Plate4	B08	WSN-for-mut309	ACA GCA ATC TCC CTT TCN NNA ATA TAC ACC CAG TCA C
Plate4	B09	WSN-for-mut310	GCA ATC TCC CTT TCC AGN NNA TAC ACC CAG TCA CAA T
Plate4	B10	WSN-for-mut311	ATC TCC CTT TCC AGA ATN NNC ACC CAG TCA CAA TAG G
Plate4	B11	WSN-for-mut312	TCC CTT TCC AGA ATA TAN NNC CAG TCA CAA TAG GAG A
Plate4	B12	WSN-for-mut313	CTT TCC AGA ATA TAC ACN NNG TCA CAA TAG GAG AGT G
Plate4	C01	WSN-for-mut314	TCC AGA ATA TAC ACC CAN NNA CAA TAG GAG AGT GCC C
Plate4	C02	WSN-for-mut315	AGA ATA TAC ACC CAG TCN NNA TAG GAG AGT GCC CAA A
Plate4	C03	WSN-for-mut316	ATA TAC ACC CAG TCA CAN NNG GAG AGT GCC CAA AAT A
Plate4	C04	WSN-for-mut317	TAC ACC CAG TCA CAA TAN NNG AGT GCC CAA AAT ATG T
Plate4	C05	WSN-for-mut318	ACC CAG TCA CAA TAG GAN NNT GCC CAA AAT ATG TCA G
Plate4	C06	WSN-for-mut319	CAG TCA CAA TAG GAG AGN NNC CAA AAT ATG TCA GGA G
Plate4	C07	WSN-for-mut320	TCA CAA TAG GAG AGT GCN NNA AAT ATG TCA GGA GTA C
Plate4	C08	WSN-for-mut321	CAA TAG GAG AGT GCC CAN NNT ATG TCA GGA GTA CCA A
Plate4	C09	WSN-for-mut322	TAG GAG AGT GCC CAA AAN NNG TCA GGA GTA CCA AAT T
Plate4	C10	WSN-for-mut323	GAG AGT GCC CAA AAT ATN NNA GGA GTA CCA AAT TGA G
Plate4	C11	WSN-for-mut324	AGT GCC CAA AAT ATG TCN NNA GTA CCA AAT TGA GGA T
Plate4	C12	WSN-for-mut325	GCC CAA AAT ATG TCA GGN NNA CCA AAT TGA GGA TGG T
Plate4	D01	WSN-for-mut326	CAA AAT ATG TCA GGA GTN NNA AAT TGA GGA TGG TTA C
Plate4	D02	WSN-for-mut327	AAT ATG TCA GGA GTA CCN NNT TGA GGA TGG TTA CAG G
Plate4	D03	WSN-for-mut328	ATG TCA GGA GTA CCA AAN NNA GGA TGG TTA CAG GAC T
Plate4	D04	WSN-for-mut329	TCA GGA GTA CCA AAT TGN NNA TGG TTA CAG GAC TAA G
Plate4	D05	WSN-for-mut330	GGA GTA CCA AAT TGA GGN NNG TTA CAG GAC TAA GAA A
Plate4	D06	WSN-for-mut331	GTA CCA AAT TGA GGA TGN NNA CAG GAC TAA GAA ACA T
Plate4	D07	WSN-for-mut332	CCA AAT TGA GGA TGG TTN NNG GAC TAA GAA ACA TCC C
Plate4	D08	WSN-for-mut333	AAT TGA GGA TGG TTA CAN NNC TAA GAA ACA TCC CAT C
Plate4	D09	WSN-for-mut334	TGA GGA TGG TTA CAG GAN NNA GAA ACA TCC CAT CCA T
Plate4	D10	WSN-for-mut335	GGA TGG TTA CAG GAC TAN NNA ACA TCC CAT CCA TTC A
Plate4	D11	WSN-for-mut336	TGG TTA CAG GAC TAA GAN NNA TCC CAT CCA TTC AAT A
Plate4	D12	WSN-for-mut337	TTA CAG GAC TAA GAA ACN NNC CAT CCA TTC AAT ACA G
Plate4	E01	WSN-for-mut338	CAG GAC TAA GAA ACA TCN NNT CCA TTC AAT ACA GAG G
Plate4	E02	WSN-for-mut339	GAC TAA GAA ACA TCC CAN NNA TTC AAT ACA GAG GTC T
Plate4	E03	WSN-for-mut340	TAA GAA ACA TCC CAT CCN NNC AAT ACA GAG GTC TAT T
Plate4	E04	WSN-for-mut341	GAA ACA TCC CAT CCA TTN NNT ACA GAG GTC TAT TTG G
Plate4	E05	WSN-for-mut342	ACA TCC CAT CCA TTC AAN NNA GAG GTC TAT TTG GAG C
Plate4	E06	WSN-for-mut343	TCC CAT CCA TTC AAT ACN NNG GTC TAT TTG GAG CCA T
Plate4	E07	WSN-for-mut344	CAT CCA TTC AAT ACA GAN NNC TAT TTG GAG CCA TTG C
Plate4	E08	WSN-for-mut345	CCA TTC AAT ACA GAG GTN NNT TTG GAG CCA TTG CTG G
Plate4	E09	WSN-for-mut346	TTC AAT ACA GAG GTC TAN NNG GAG CCA TTG CTG GTT T
Plate4	E10	WSN-for-mut347	AAT ACA GAG GTC TAT TTN NNG CCA TTG CTG GTT TTA T
Plate4	E11	WSN-for-mut348	ACA GAG GTC TAT TTG GAN NNA TTG CTG GTT TTA TTG A
Plate4	E12	WSN-for-mut349	GAG GTC TAT TTG GAG CCN NNG CTG GTT TTA TTG AGG G
Plate4	F01	WSN-for-mut350	GTC TAT TTG GAG CCA TTN NNG GTT TTA TTG AGG GGG G
Plate4	F02	WSN-for-mut351	TAT TTG GAG CCA TTG CTN NNT TTA TTG AGG GGG GAT G
Plate4	F03	WSN-for-mut352	TTG GAG CCA TTG CTG GTN NNA TTG AGG GGG GAT GGA C
Plate4	F04	WSN-for-mut353	GAG CCA TTG CTG GTT TTN NNG AGG GGG GAT GGA CTG G
Plate4	F05	WSN-for-mut354	CCA TTG CTG GTT TTA TTN NNG GGG GAT GGA CTG GAA T
Plate4	F06	WSN-for-mut355	TTG CTG GTT TTA TTG AGN NNG GAT GGA CTG GAA TGA T
Plate4	F07	WSN-for-mut356	CTG GTT TTA TTG AGG GGN NNT GGA CTG GAA TGA TAG A
Plate4	F08	WSN-for-mut357	GTT TTA TTG AGG GGG GAN NNA CTG GAA TGA TAG ATG G
Plate4	F09	WSN-for-mut358	TTA TTG AGG GGG GAT GGN NNG GAA TGA TAG ATG GAT G
Plate4	F10	WSN-for-mut359	TTG AGG GGG GAT GGA CTN NNA TGA TAG ATG GAT GGT A
Plate4	F11	WSN-for-mut360	AGG GGG GAT GGA CTG GAN NNA TAG ATG GAT GGT ATG G
Plate4	F12	WSN-for-mut361	GGG GAT GGA CTG GAA TGN NNG ATG GAT GGT ATG GTT A
Plate4	G01	WSN-for-mut362	GAT GGA CTG GAA TGA TAN NNG GAT GGT ATG GTT ATC A
Plate4	G02	WSN-for-mut363	GGA CTG GAA TGA TAG ATN NNT GGT ATG GTT ATC ATC A
Plate4	G03	WSN-for-mut364	CTG GAA TGA TAG ATG GAN NNT ATG GTT ATC ATC ATC A
Plate4	G04	WSN-for-mut365	GAA TGA TAG ATG GAT GGN NNG GTT ATC ATC ATC AGA A
Plate4	G05	WSN-for-mut366	TGA TAG ATG GAT GGT ATN NNT ATC ATC ATC AGA ATG A
Plate4	G06	WSN-for-mut367	TAG ATG GAT GGT ATG GTN NNC ATC ATC AGA ATG AAC A
Plate4	G07	WSN-for-mut368	ATG GAT GGT ATG GTT ATN NNC ATC AGA ATG AAC AGG G
Plate4	G08	WSN-for-mut369	GAT GGT ATG GTT ATC ATN NNC AGA ATG AAC AGG GAT C
Plate4	G09	WSN-for-mut370	GGT ATG GTT ATC ATC ATN NNA ATG AAC AGG GAT CAG G
Plate4	G10	WSN-for-mut371	ATG GTT ATC ATC ATC AGN NNG AAC AGG GAT CAG GCT A
Plate4	G11	WSN-for-mut372	GTT ATC ATC ATC AGA ATN NNC AGG GAT CAG GCT ATG C
Plate4	G12	WSN-for-mut373	ATC ATC ATC AGA ATG AAN NNG GAT CAG GCT ATG CAG C
Plate4	H01	WSN-for-mut374	ATC ATC AGA ATG AAC AGN NNT CAG GCT ATG CAG CGG A
Plate4	H02	WSN-for-mut375	ATC AGA ATG AAC AGG GAN NNG GCT ATG CAG CGG ATC A
Plate4	H03	WSN-for-mut376	AGA ATG AAC AGG GAT CAN NNT ATG CAG CGG ATC AAA A
Plate4	H04	WSN-for-mut377	ATG AAC AGG GAT CAG GCN NNG CAG CGG ATC AAA AAA G
Plate4	H05	WSN-for-mut378	AAC AGG GAT CAG GCT ATN NNG CGG ATC AAA AAA GCA C
Plate4	H06	WSN-for-mut379	AGG GAT CAG GCT ATG CAN NNG ATC AAA AAA GCA CAC A
Plate4	H07	WSN-for-mut380	GAT CAG GCT ATG CAG CGN NNC AAA AAA GCA CAC AAA A
Plate4	H08	WSN-for-mut381	CAG GCT ATG CAG CGG ATN NNA AAA GCA CAC AAA ATG C
Plate4	H09	WSN-for-mut382	GCT ATG CAG CGG ATC AAN NNA GCA CAC AAA ATG CCA T
Plate4	H10	WSN-for-mut383	ATG CAG CGG ATC AAA AAN NNA CAC AAA ATG CCA TTA A
Plate4	H11	WSN-for-mut384	CAG CGG ATC AAA AAA GCN NNC AAA ATG CCA TTA ACG G
Plate4	H12	WSN-for-mut385	CGG ATC AAA AAA GCA CAN NNA ATG CCA TTA ACG GGA T
Plate5	A01	WSN-for-mut386	ATC AAA AAA GCA CAC AAN NNG CCA TTA ACG GGA TTA C
Plate5	A02	WSN-for-mut387	AAA AAA GCA CAC AAA ATN NNA TTA ACG GGA TTA CAA A
Plate5	A03	WSN-for-mut388	AAA GCA CAC AAA ATG CCN NNA ACG GGA TTA CAA ACA A
Plate5	A04	WSN-for-mut389	GCA CAC AAA ATG CCA TTN NNG GGA TTA CAA ACA AGG T
Plate5	A05	WSN-for-mut390	CAC AAA ATG CCA TTA ACN NNA TTA CAA ACA AGG TGA A
Plate5	A06	WSN-for-mut391	AAA ATG CCA TTA ACG GGN NNA CAA ACA AGG TGA ACT C
Plate5	A07	WSN-for-mut392	ATG CCA TTA ACG GGA TTN NNA ACA AGG TGA ACT CTG T
Plate5	A08	WSN-for-mut393	CCA TTA ACG GGA TTA CAN NNA AGG TGA ACT CTG TTA T
Plate5	A09	WSN-for-mut394	TTA ACG GGA TTA CAA ACN NNG TGA ACT CTG TTA TCG A
Plate5	A10	WSN-for-mut395	ACG GGA TTA CAA ACA AGN NNA ACT CTG TTA TCG AGA A
Plate5	A11	WSN-for-mut396	GGA TTA CAA ACA AGG TGN NNT CTG TTA TCG AGA AAA T
Plate5	A12	WSN-for-mut397	TTA CAA ACA AGG TGA ACN NNG TTA TCG AGA AAA TGA A
Plate5	B01	WSN-for-mut398	CAA ACA AGG TGA ACT CTN NNA TCG AGA AAA TGA ACA C
Plate5	B02	WSN-for-mut399	ACA AGG TGA ACT CTG TTN NNG AGA AAA TGA ACA CTC A
Plate5	B03	WSN-for-mut400	AGG TGA ACT CTG TTA TCN NNA AAA TGA ACA CTC AAT T
Plate5	B04	WSN-for-mut401	TGA ACT CTG TTA TCG AGN NNA TGA ACA CTC AAT TCA C
Plate5	B05	WSN-for-mut402	ACT CTG TTA TCG AGA AAN NNA ACA CTC AAT TCA CAG C
Plate5	B06	WSN-for-mut403	CTG TTA TCG AGA AAA TGN NNA CTC AAT TCA CAG CTG T
Plate5	B07	WSN-for-mut404	TTA TCG AGA AAA TGA ACN NNC AAT TCA CAG CTG TGG G
Plate5	B08	WSN-for-mut405	TCG AGA AAA TGA ACA CTN NNT TCA CAG CTG TGG GTA A
Plate5	B09	WSN-for-mut406	AGA AAA TGA ACA CTC AAN NNA CAG CTG TGG GTA AAG A
Plate5	B10	WSN-for-mut407	AAA TGA ACA CTC AAT TCN NNG CTG TGG GTA AAG AAT T
Plate5	B11	WSN-for-mut408	TGA ACA CTC AAT TCA CAN NNG TGG GTA AAG AAT TCA A
Plate5	B12	WSN-for-mut409	ACA CTC AAT TCA CAG CTN NNG GTA AAG AAT TCA ACA A
Plate5	C01	WSN-for-mut410	CTC AAT TCA CAG CTG TGN NNA AAG AAT TCA ACA ACT T
Plate5	C02	WSN-for-mut411	AAT TCA CAG CTG TGG GTN NNG AAT TCA ACA ACT TAG A
Plate5	C03	WSN-for-mut412	TCA CAG CTG TGG GTA AAN NNT TCA ACA ACT TAG AAA A
Plate5	C04	WSN-for-mut413	CAG CTG TGG GTA AAG AAN NNA ACA ACT TAG AAA AAA G
Plate5	C05	WSN-for-mut414	CTG TGG GTA AAG AAT TCN NNA ACT TAG AAA AAA GGA T
Plate5	C06	WSN-for-mut415	TGG GTA AAG AAT TCA ACN NNT TAG AAA AAA GGA TGG A
Plate5	C07	WSN-for-mut416	GTA AAG AAT TCA ACA ACN NNG AAA AAA GGA TGG AAA A
Plate5	C08	WSN-for-mut417	AAG AAT TCA ACA ACT TAN NNA AAA GGA TGG AAA ATT T
Plate5	C09	WSN-for-mut418	AAT TCA ACA ACT TAG AAN NNA GGA TGG AAA ATT TAA A
Plate5	C10	WSN-for-mut419	TCA ACA ACT TAG AAA AAN NNA TGG AAA ATT TAA ATA A
Plate5	C11	WSN-for-mut420	ACA ACT TAG AAA AAA GGN NNG AAA ATT TAA ATA AAA A
Plate5	C12	WSN-for-mut421	ACT TAG AAA AAA GGA TGN NNA ATT TAA ATA AAA AAG T
Plate5	D01	WSN-for-mut422	TAG AAA AAA GGA TGG AAN NNT TAA ATA AAA AAG TTG A
Plate5	D02	WSN-for-mut423	AAA AAA GGA TGG AAA ATN NNA ATA AAA AAG TTG ATG A
Plate5	D03	WSN-for-mut424	AAA GGA TGG AAA ATT TAN NNA AAA AAG TTG ATG ATG G
Plate5	D04	WSN-for-mut425	GGA TGG AAA ATT TAA ATN NNA AAG TTG ATG ATG GGT T
Plate5	D05	WSN-for-mut426	TGG AAA ATT TAA ATA AAN NNG TTG ATG ATG GGT TTC T
Plate5	D06	WSN-for-mut427	AAA ATT TAA ATA AAA AAN NNG ATG ATG GGT TTC TGG A
Plate5	D07	WSN-for-mut428	ATT TAA ATA AAA AAG TTN NNG ATG GGT TTC TGG ACA T
Plate5	D08	WSN-for-mut429	TAA ATA AAA AAG TTG ATN NNG GGT TTC TGG ACA TTT G
Plate5	D09	WSN-for-mut430	ATA AAA AAG TTG ATG ATN NNT TTC TGG ACA TTT GGA C
Plate5	D10	WSN-for-mut431	AAA AAG TTG ATG ATG GGN NNC TGG ACA TTT GGA CAT A
Plate5	D11	WSN-for-mut432	AAG TTG ATG ATG GGT TTN NNG ACA TTT GGA CAT ATA A
Plate5	D12	WSN-for-mut433	TTG ATG ATG GGT TTC TGN NNA TTT GGA CAT ATA ATG C
Plate5	E01	WSN-for-mut434	ATG ATG GGT TTC TGG ACN NNT GGA CAT ATA ATG CAG A
Plate5	E02	WSN-for-mut435	ATG GGT TTC TGG ACA TTN NNA CAT ATA ATG CAG AAT T
Plate5	E03	WSN-for-mut436	GGT TTC TGG ACA TTT GGN NNT ATA ATG CAG AAT TGT T
Plate5	E04	WSN-for-mut437	TTC TGG ACA TTT GGA CAN NNA ATG CAG AAT TGT TAG T
Plate5	E05	WSN-for-mut438	TGG ACA TTT GGA CAT ATN NNG CAG AAT TGT TAG TTC T
Plate5	E06	WSN-for-mut439	ACA TTT GGA CAT ATA ATN NNG AAT TGT TAG TTC TAC T
Plate5	E07	WSN-for-mut440	TTT GGA CAT ATA ATG CAN NNT TGT TAG TTC TAC TGG A
Plate5	E08	WSN-for-mut441	GGA CAT ATA ATG CAG AAN NNT TAG TTC TAC TGG AAA A
Plate5	E09	WSN-for-mut442	CAT ATA ATG CAG AAT TGN NNG TTC TAC TGG AAA ATG A
Plate5	E10	WSN-for-mut443	ATA ATG CAG AAT TGT TAN NNC TAC TGG AAA ATG AAA G
Plate5	E11	WSN-for-mut444	ATG CAG AAT TGT TAG TTN NNC TGG AAA ATG AAA GGA C
Plate5	E12	WSN-for-mut445	CAG AAT TGT TAG TTC TAN NNG AAA ATG AAA GGA CTT T
Plate5	F01	WSN-for-mut446	AAT TGT TAG TTC TAC TGN NNA ATG AAA GGA CTT TGG A
Plate5	F02	WSN-for-mut447	TGT TAG TTC TAC TGG AAN NNG AAA GGA CTT TGG ATT T
Plate5	F03	WSN-for-mut448	TAG TTC TAC TGG AAA ATN NNA GGA CTT TGG ATT TCC A
Plate5	F04	WSN-for-mut449	TTC TAC TGG AAA ATG AAN NNA CTT TGG ATT TCC ATG A
Plate5	F05	WSN-for-mut450	TAC TGG AAA ATG AAA GGN NNT TGG ATT TCC ATG ACT T
Plate5	F06	WSN-for-mut451	TGG AAA ATG AAA GGA CTN NNG ATT TCC ATG ACT TAA A
Plate5	F07	WSN-for-mut452	AAA ATG AAA GGA CTT TGN NNT TCC ATG ACT TAA ATG T
Plate5	F08	WSN-for-mut453	ATG AAA GGA CTT TGG ATN NNC ATG ACT TAA ATG TGA A
Plate5	F09	WSN-for-mut454	AAA GGA CTT TGG ATT TCN NNG ACT TAA ATG TGA AGA A
Plate5	F10	WSN-for-mut455	GGA CTT TGG ATT TCC ATN NNT TAA ATG TGA AGA ATC T
Plate5	F11	WSN-for-mut456	CTT TGG ATT TCC ATG ACN NNA ATG TGA AGA ATC TGT A
Plate5	F12	WSN-for-mut457	TGG ATT TCC ATG ACT TAN NNG TGA AGA ATC TGT ACG A
Plate5	G01	WSN-for-mut458	ATT TCC ATG ACT TAA ATN NNA AGA ATC TGT ACG AGA A
Plate5	G02	WSN-for-mut459	TCC ATG ACT TAA ATG TGN NNA ATC TGT ACG AGA AAG T
Plate5	G03	WSN-for-mut460	ATG ACT TAA ATG TGA AGN NNC TGT ACG AGA AAG TAA A
Plate5	G04	WSN-for-mut461	ACT TAA ATG TGA AGA ATN NNT ACG AGA AAG TAA AAA G
Plate5	G05	WSN-for-mut462	TAA ATG TGA AGA ATC TGN NNG AGA AAG TAA AAA GCC A
Plate5	G06	WSN-for-mut463	ATG TGA AGA ATC TGT ACN NNA AAG TAA AAA GCC AAT T
Plate5	G07	WSN-for-mut464	TGA AGA ATC TGT ACG AGN NNG TAA AAA GCC AAT TAA A
Plate5	G08	WSN-for-mut465	AGA ATC TGT ACG AGA AAN NNA AAA GCC AAT TAA AGA A
Plate5	G09	WSN-for-mut466	ATC TGT ACG AGA AAG TAN NNA GCC AAT TAA AGA ATA A
Plate5	G10	WSN-for-mut467	TGT ACG AGA AAG TAA AAN NNC AAT TAA AGA ATA ATG C
Plate5	G11	WSN-for-mut468	ACG AGA AAG TAA AAA GCN NNT TAA AGA ATA ATG CCA A
Plate5	G12	WSN-for-mut469	AGA AAG TAA AAA GCC AAN NNA AGA ATA ATG CCA AAG A
Plate5	H01	WSN-for-mut470	AAG TAA AAA GCC AAT TAN NNA ATA ATG CCA AAG AAA T
Plate5	H02	WSN-for-mut471	TAA AAA GCC AAT TAA AGN NNA ATG CCA AAG AAA TCG G
Plate5	H03	WSN-for-mut472	AAA GCC AAT TAA AGA ATN NNG CCA AAG AAA TCG GAA A
Plate5	H04	WSN-for-mut473	GCC AAT TAA AGA ATA ATN NNA AAG AAA TCG GAA ATG G
Plate5	H05	WSN-for-mut474	AAT TAA AGA ATA ATG CCN NNG AAA TCG GAA ATG GGT G
Plate5	H06	WSN-for-mut475	TAA AGA ATA ATG CCA AAN NNA TCG GAA ATG GGT GTT T
Plate5	H07	WSN-for-mut476	AGA ATA ATG CCA AAG AAN NNG GAA ATG GGT GTT TTG A
Plate5	H08	WSN-for-mut477	ATA ATG CCA AAG AAA TCN NNA ATG GGT GTT TTG AGT T
Plate5	H09	WSN-for-mut478	ATG CCA AAG AAA TCG GAN NNG GGT GTT TTG AGT TCT A
Plate5	H10	WSN-for-mut479	CCA AAG AAA TCG GAA ATN NNT GTT TTG AGT TCT ACC A
Plate5	H11	WSN-for-mut480	AAG AAA TCG GAA ATG GGN NNT TTG AGT TCT ACC ACA A
Plate5	H12	WSN-for-mut481	AAA TCG GAA ATG GGT GTN NNG AGT TCT ACC ACA AGT G
Plate6	A01	WSN-for-mut482	TCG GAA ATG GGT GTT TTN NNT TCT ACC ACA AGT GTG A
Plate6	A02	WSN-for-mut483	GAA ATG GGT GTT TTG AGN NNT ACC ACA AGT GTG ACA A
Plate6	A03	WSN-for-mut484	ATG GGT GTT TTG AGT TCN NNC ACA AGT GTG ACA ATG A
Plate6	A04	WSN-for-mut485	GGT GTT TTG AGT TCT ACN NNA AGT GTG ACA ATG AAT G
Plate6	A05	WSN-for-mut486	GTT TTG AGT TCT ACC ACN NNT GTG ACA ATG AAT GCA T
Plate6	A06	WSN-for-mut487	TTG AGT TCT ACC ACA AGN NNG ACA ATG AAT GCA TGG A
Plate6	A07	WSN-for-mut488	AGT TCT ACC ACA AGT GTN NNA ATG AAT GCA TGG AAA G
Plate6	A08	WSN-for-mut489	TCT ACC ACA AGT GTG ACN NNG AAT GCA TGG AAA GTG T
Plate6	A09	WSN-for-mut490	ACC ACA AGT GTG ACA ATN NNT GCA TGG AAA GTG TAA G
Plate6	A10	WSN-for-mut491	ACA AGT GTG ACA ATG AAN NNA TGG AAA GTG TAA GAA A
Plate6	A11	WSN-for-mut492	AGT GTG ACA ATG AAT GCN NNG AAA GTG TAA GAA ATG G
Plate6	A12	WSN-for-mut493	GTG ACA ATG AAT GCA TGN NNA GTG TAA GAA ATG GGA C
Plate6	B01	WSN-for-mut494	ACA ATG AAT GCA TGG AAN NNG TAA GAA ATG GGA CTT A
Plate6	B02	WSN-for-mut495	ATG AAT GCA TGG AAA GTN NNA GAA ATG GGA CTT ATG A
Plate6	B03	WSN-for-mut496	AAT GCA TGG AAA GTG TAN NNA ATG GGA CTT ATG ATT A
Plate6	B04	WSN-for-mut497	GCA TGG AAA GTG TAA GAN NNG GGA CTT ATG ATT ATC C
Plate6	B05	WSN-for-mut498	TGG AAA GTG TAA GAA ATN NNA CTT ATG ATT ATC CAA A
Plate6	B06	WSN-for-mut499	AAA GTG TAA GAA ATG GGN NNT ATG ATT ATC CAA AAT A
Plate6	B07	WSN-for-mut500	GTG TAA GAA ATG GGA CTN NNG ATT ATC CAA AAT ATT C
Plate6	B08	WSN-for-mut501	TAA GAA ATG GGA CTT ATN NNT ATC CAA AAT ATT CAG A
Plate6	B09	WSN-for-mut502	GAA ATG GGA CTT ATG ATN NNC CAA AAT ATT CAG AAG A
Plate6	B10	WSN-for-mut503	ATG GGA CTT ATG ATT ATN NNA AAT ATT CAG AAG AAT C
Plate6	B11	WSN-for-mut504	GGA CTT ATG ATT ATC CAN NNT ATT CAG AAG AAT CAA A
Plate6	B12	WSN-for-mut505	CTT ATG ATT ATC CAA AAN NNT CAG AAG AAT CAA AGT T
Plate6	C01	WSN-for-mut506	ATG ATT ATC CAA AAT ATN NNG AAG AAT CAA AGT TGA A
Plate6	C02	WSN-for-mut507	ATT ATC CAA AAT ATT CAN NNG AAT CAA AGT TGA ACA G
Plate6	C03	WSN-for-mut508	ATC CAA AAT ATT CAG AAN NNT CAA AGT TGA ACA GGG A
Plate6	C04	WSN-for-mut509	CAA AAT ATT CAG AAG AAN NNA AGT TGA ACA GGG AAA A
Plate6	C05	WSN-for-mut510	AAT ATT CAG AAG AAT CAN NNT TGA ACA GGG AAA AGA T
Plate6	C06	WSN-for-mut511	ATT CAG AAG AAT CAA AGN NNA ACA GGG AAA AGA TAG A
Plate6	C07	WSN-for-mut512	CAG AAG AAT CAA AGT TGN NNA GGG AAA AGA TAG ATG G
Plate6	C08	WSN-for-mut513	AAG AAT CAA AGT TGA ACN NNG AAA AGA TAG ATG GAG T
Plate6	C09	WSN-for-mut514	AAT CAA AGT TGA ACA GGN NNA AGA TAG ATG GAG TGA A
Plate6	C10	WSN-for-mut515	CAA AGT TGA ACA GGG AAN NNA TAG ATG GAG TGA AAT T
Plate6	C11	WSN-for-mut516	AGT TGA ACA GGG AAA AGN NNG ATG GAG TGA AAT TGG A
Plate6	C12	WSN-for-mut517	TGA ACA GGG AAA AGA TAN NNG GAG TGA AAT TGG AAT C
Plate6	D01	WSN-for-mut518	ACA GGG AAA AGA TAG ATN NNG TGA AAT TGG AAT CAA T
Plate6	D02	WSN-for-mut519	GGG AAA AGA TAG ATG GAN NNA AAT TGG AAT CAA TGG G
Plate6	D03	WSN-for-mut520	AAA AGA TAG ATG GAG TGN NNT TGG AAT CAA TGG GGG T
Plate6	D04	WSN-for-mut521	AGA TAG ATG GAG TGA AAN NNG AAT CAA TGG GGG TGT A
Plate6	D05	WSN-for-mut522	TAG ATG GAG TGA AAT TGN NNT CAA TGG GGG TGT ATC A
Plate6	D06	WSN-for-mut523	ATG GAG TGA AAT TGG AAN NNA TGG GGG TGT ATC AGA T
Plate6	D07	WSN-for-mut524	GAG TGA AAT TGG AAT CAN NNG GGG TGT ATC AGA TTC T
Plate6	D08	WSN-for-mut525	TGA AAT TGG AAT CAA TGN NNG TGT ATC AGA TTC TGG C
Plate6	D09	WSN-for-mut526	AAT TGG AAT CAA TGG GGN NNT ATC AGA TTC TGG CGA T
Plate6	D10	WSN-for-mut527	TGG AAT CAA TGG GGG TGN NNC AGA TTC TGG CGA TCT A
Plate6	D11	WSN-for-mut528	AAT CAA TGG GGG TGT ATN NNA TTC TGG CGA TCT ACT C
Plate6	D12	WSN-for-mut529	CAA TGG GGG TGT ATC AGN NNC TGG CGA TCT ACT CAA C
Plate6	E01	WSN-for-mut530	TGG GGG TGT ATC AGA TTN NNG CGA TCT ACT CAA CTG T
Plate6	E02	WSN-for-mut531	GGG TGT ATC AGA TTC TGN NNA TCT ACT CAA CTG TCG C
Plate6	E03	WSN-for-mut532	TGT ATC AGA TTC TGG CGN NNT ACT CAA CTG TCG CCA G
Plate6	E04	WSN-for-mut533	ATC AGA TTC TGG CGA TCN NNT CAA CTG TCG CCA GTT C
Plate6	E05	WSN-for-mut534	AGA TTC TGG CGA TCT ACN NNA CTG TCG CCA GTT CAC T
Plate6	E06	WSN-for-mut535	TTC TGG CGA TCT ACT CAN NNG TCG CCA GTT CAC TGG T
Plate6	E07	WSN-for-mut536	TGG CGA TCT ACT CAA CTN NNG CCA GTT CAC TGG TGC T
Plate6	E08	WSN-for-mut537	CGA TCT ACT CAA CTG TCN NNA GTT CAC TGG TGC TTT T
Plate6	E09	WSN-for-mut538	TCT ACT CAA CTG TCG CCN NNT CAC TGG TGC TTT TGG T
Plate6	E10	WSN-for-mut539	ACT CAA CTG TCG CCA GTN NNC TGG TGC TTT TGG TCT C
Plate6	E11	WSN-for-mut540	CAA CTG TCG CCA GTT CAN NNG TGC TTT TGG TCT CCC T
Plate6	E12	WSN-for-mut541	CTG TCG CCA GTT CAC TGN NNC TTT TGG TCT CCC TGG G
Plate6	F01	WSN-for-mut542	TCG CCA GTT CAC TGG TGN NNT TGG TCT CCC TGG GGG C
Plate6	F02	WSN-for-mut543	CCA GTT CAC TGG TGC TTN NNG TCT CCC TGG GGG CAA T
Plate6	F03	WSN-for-mut544	GTT CAC TGG TGC TTT TGN NNT CCC TGG GGG CAA TCA G
Plate6	F04	WSN-for-mut545	CAC TGG TGC TTT TGG TCN NNC TGG GGG CAA TCA GTT T
Plate6	F05	WSN-for-mut546	TGG TGC TTT TGG TCT CCN NNG GGG CAA TCA GTT TCT G
Plate6	F06	WSN-for-mut547	TGC TTT TGG TCT CCC TGN NNG CAA TCA GTT TCT GGA T
Plate6	F07	WSN-for-mut548	TTT TGG TCT CCC TGG GGN NNA TCA GTT TCT GGA TGT G
Plate6	F08	WSN-for-mut549	TGG TCT CCC TGG GGG CAN NNA GTT TCT GGA TGT GTT C
Plate6	F09	WSN-for-mut550	TCT CCC TGG GGG CAA TCN NNT TCT GGA TGT GTT CTA A
Plate6	F10	WSN-for-mut551	CCC TGG GGG CAA TCA GTN NNT GGA TGT GTT CTA ATG G
Plate6	F11	WSN-for-mut552	TGG GGG CAA TCA GTT TCN NNA TGT GTT CTA ATG GGT C
Plate6	F12	WSN-for-mut553	GGG CAA TCA GTT TCT GGN NNT GTT CTA ATG GGT CTT T
Plate6	G01	WSN-for-mut554	CAA TCA GTT TCT GGA TGN NNT CTA ATG GGT CTT TGC A
Plate6	G02	WSN-for-mut555	TCA GTT TCT GGA TGT GTN NNA ATG GGT CTT TGC AGT G
Plate6	G03	WSN-for-mut556	GTT TCT GGA TGT GTT CTN NNG GGT CTT TGC AGT GCA G
Plate6	G04	WSN-for-mut557	TCT GGA TGT GTT CTA ATN NNT CTT TGC AGT GCA GAA T
Plate6	G05	WSN-for-mut558	GGA TGT GTT CTA ATG GGN NNT TGC AGT GCA GAA TAT G
Plate6	G06	WSN-for-mut559	TGT GTT CTA ATG GGT CTN NNC AGT GCA GAA TAT GCA T
Plate6	G07	WSN-for-mut560	GTT CTA ATG GGT CTT TGN NNT GCA GAA TAT GCA TCT G
Plate6	G08	WSN-for-mut561	CTA ATG GGT CTT TGC AGN NNA GAA TAT GCA TCT GAG A
Plate6	G09	WSN-for-mut562	ATG GGT CTT TGC AGT GCN NNA TAT GCA TCT GAG ATT A
Plate6	G10	WSN-for-mut563	GGT CTT TGC AGT GCA GAN NNT GCA TCT GAG ATT AGG A
Plate6	G11	WSN-for-mut564	CTT TGC AGT GCA GAA TAN NNA TCT GAG ATT AGG ATT T
Plate6	G12	WSN-for-mut565	TGC AGT GCA GAA TAT GCN NNT GAG ATT AGG ATT TCA G
Plate7	A01		AGG ACC AGT AGT TTT GCN NNC ATT TTG GTT GTT TTT A
Plate7	A02	WSN-rev-mut3	AAC AGG ACC AGT AGT TTN NNC TTC ATT TTG GTT GTT T
Plate7	A03	WSN-rev-mut4	TAT AAC AGG ACC AGT AGN NNT GCC TTC ATT TTG GTT G
Plate7	A04	WSN-rev-mut5	GCA TAT AAC AGG ACC AGN NNT TTT GCC TTC ATT TTG G
Plate7	A05	WSN-rev-mut6	AAT GCA TAT AAC AGG ACN NNT AGT TTT GCC TTC ATT T
Plate7	A06	WSN-rev-mut7	ACA AAT GCA TAT AAC AGN NNC AGT AGT TTT GCC TTC A
Plate7	A07	WSN-rev-mut8	GCT ACA AAT GCA TAT AAN NNG ACC AGT AGT TTT GCC T
Plate7	A08	WSN-rev-mut9	GTA GCT ACA AAT GCA TAN NNC AGG ACC AGT AGT TTT G
Plate7	A09	WSN-rev-mut10	TCT GTA GCT ACA AAT GCN NNT AAC AGG ACC AGT AGT T
Plate7	A10	WSN-rev-mut11	GCA TCT GTA GCT ACA AAN NNA TAT AAC AGG ACC AGT A
Plate7	A11	WSN-rev-mut12	TCT GCA TCT GTA GCT ACN NNT GCA TAT AAC AGG ACC A
Plate7	A12	WSN-rev-mut13	GTG TCT GCA TCT GTA GCN NNA AAT GCA TAT AAC AGG A
Plate7	B01	WSN-rev-mut14	ATT GTG TCT GCA TCT GTN NNT ACA AAT GCA TAT AAC A
Plate7	B02	WSN-rev-mut15	CAT ATT GTG TCT GCA TCN NNA GCT ACA AAT GCA TAT A
Plate7	B03	WSN-rev-mut16	ATA CAT ATT GTG TCT GCN NNT GTA GCT ACA AAT GCA T
Plate7	B04	WSN-rev-mut17	CCT ATA CAT ATT GTG TCN NNA TCT GTA GCT ACA AAT G
Plate7	B05	WSN-rev-mut18	TAG CCT ATA CAT ATT GTN NNT GCA TCT GTA GCT ACA A
Plate7	B06	WSN-rev-mut19	TGG TAG CCT ATA CAT ATN NNG TCT GCA TCT GTA GCT A
Plate7	B07	WSN-rev-mut20	GCA TGG TAG CCT ATA CAN NNT GTG TCT GCA TCT GTA G
Plate7	B08	WSN-rev-mut21	TTC GCA TGG TAG CCT ATN NNT ATT GTG TCT GCA TCT G
Plate7	B09	WSN-rev-mut22	TTG TTC GCA TGG TAG CCN NNA CAT ATT GTG TCT GCA T
Plate7	B10	WSN-rev-mut23	GAG TTG TTC GCA TGG TAN NNT ATA CAT ATT GTG TCT G
Plate7	B11	WSN-rev-mut24	GTT GAG TTG TTC GCA TGN NNG CCT ATA CAT ATT GTG T
Plate7	B12	WSN-rev-mut25	TCG GTT GAG TTG TTC GCN NNG TAG CCT ATA CAT ATT G
Plate7	C01	WSN-rev-mut26	GTG TCG GTT GAG TTG TTN NNA TGG TAG CCT ATA CAT A
Plate7	C02	WSN-rev-mut27	ACA GTG TCG GTT GAG TTN NNC GCA TGG TAG CCT ATA C
Plate7	C03	WSN-rev-mut28	TCA ACA GTG TCG GTT GAN NNG TTC GCA TGG TAG CCT A
Plate7	C04	WSN-rev-mut29	GTG TCA ACA GTG TCG GTN NNG TTG TTC GCA TGG TAG C
Plate7	C05	WSN-rev-mut30	ATT GTG TCA ACA GTG TCN NNT GAG TTG TTC GCA TGG T
Plate7	C06	WSN-rev-mut31	AGT ATT GTG TCA ACA GTN NNG GTT GAG TTG TTC GCA T
Plate7	C07	WSN-rev-mut32	TCG AGT ATT GTG TCA ACN NNG TCG GTT GAG TTG TTC G
Plate7	C08	WSN-rev-mut33	TTC TCG AGT ATT GTG TCN NNA GTG TCG GTT GAG TTG T
Plate7	C09	WSN-rev-mut34	TTC TTC TCG AGT ATT GTN NNA ACA GTG TCG GTT GAG T
Plate7	C10	WSN-rev-mut35	ACA TTC TTC TCG AGT ATN NNG TCA ACA GTG TCG GTT G
Plate7	C11	WSN-rev-mut36	GCC ACA TTC TTC TCG AGN NNT GTG TCA ACA GTG TCG G
Plate7	C12	WSN-rev-mut37	ACT GCC ACA TTC TTC TCN NNT ATT GTG TCA ACA GTG T
Plate7	D01	WSN-rev-mut38	GTC ACT GCC ACA TTC TTN NNG AGT ATT GTG TCA ACA G
Plate7	D02	WSN-rev-mut39	TGT GTC ACT GCC ACA TTN NNC TCG AGT ATT GTG TCA A
Plate7	D03	WSN-rev-mut40	GAA TGT GTC ACT GCC ACN NNC TTC TCG AGT ATT GTG T
Plate7	D04	WSN-rev-mut41	ACA GAA TGT GTC ACT GCN NNA TTC TTC TCG AGT ATT G
Plate7	D05	WSN-rev-mut42	TTA ACA GAA TGT GTC ACN NNC ACA TTC TTC TCG AGT A
Plate7	D06	WSN-rev-mut43	AGG TTA ACA GAA TGT GTN NNT GCC ACA TTC TTC TCG A
Plate7	D07	WSN-rev-mut44	AGC AGG TTA ACA GAA TGN NNC ACT GCC ACA TTC TTC T
Plate7	D08	WSN-rev-mut45	TCG AGC AGG TTA ACA GAN NNT GTC ACT GCC ACA TTC T
Plate7	D09	WSN-rev-mut46	TCT TCG AGC AGG TTA ACN NNA TGT GTC ACT GCC ACA T
Plate7	D10	WSN-rev-mut47	CTG TCT TCG AGC AGG TTN NNA GAA TGT GTC ACT GCC A
Plate7	D11	WSN-rev-mut48	TGG CTG TCT TCG AGC AGN NNA ACA GAA TGT GTC ACT G
Plate7	D12	WSN-rev-mut49	TTG TGG CTG TCT TCG AGN NNG TTA ACA GAA TGT GTC A
Plate7	E01	WSN-rev-mut50	CCG TTG TGG CTG TCT TCN NNC AGG TTA ACA GAA TGT G
Plate7	E02	WSN-rev-mut51	TTC CCG TTG TGG CTG TCN NNG AGC AGG TTA ACA GAA T
Plate7	E03	WSN-rev-mut52	AGT TTC CCG TTG TGG CTN NNT TCG AGC AGG TTA ACA G
Plate7	E04	WSN-rev-mut53	CAT AGT TTC CCG TTG TGN NNG TCT TCG AGC AGG TTA A
Plate7	E05	WSN-rev-mut54	TTA CAT AGT TTC CCG TTN NNG CTG TCT TCG AGC AGG T
Plate7	E06	WSN-rev-mut55	AAT TTA CAT AGT TTC CCN NNG TGG CTG TCT TCG AGC A
Plate7	E07	WSN-rev-mut56	TTT AAT TTA CAT AGT TTN NNG TTG TGG CTG TCT TCG A
Plate7	E08	WSN-rev-mut57	CCT TTT AAT TTA CAT AGN NNC CCG TTG TGG CTG TCT T
Plate7	E09	WSN-rev-mut58	ATT CCT TTT AAT TTA CAN NNT TTC CCG TTG TGG CTG T
Plate7	E10	WSN-rev-mut59	GCT ATT CCT TTT AAT TTN NNT AGT TTC CCG TTG TGG C
Plate7	E11	WSN-rev-mut60	GGG GCT ATT CCT TTT AAN NNA CAT AGT TTC CCG TTG T
Plate7	E12	WSN-rev-mut61	AGT GGG GCT ATT CCT TTN NNT TTA CAT AGT TTC CCG T
Plate7	F01	WSN-rev-mut62	TGT AGT GGG GCT ATT CCN NNT AAT TTA CAT AGT TTC C
Plate7	F02	WSN-rev-mut63	AAT TGT AGT GGG GCT ATN NNT TTT AAT TTA CAT AGT T
Plate7	F03	WSN-rev-mut64	CCC AAT TGT AGT GGG GCN NNT CCT TTT AAT TTA CAT A
Plate7	F04	WSN-rev-mut65	TTC CCC AAT TGT AGT GGN NNT ATT CCT TTT AAT TTA C
Plate7	F05	WSN-rev-mut66	CAT TTC CCC AAT TGT AGN NNG GCT ATT CCT TTT AAT T
Plate7	F06	WSN-rev-mut67	TTA CAT TTC CCC AAT TGN NNT GGG GCT ATT CCT TTT A
Plate7	F07	WSN-rev-mut68	ATG TTA CAT TTC CCC AAN NNT AGT GGG GCT ATT CCT T
Plate7	F08	WSN-rev-mut69	GTG ATG TTA CAT TTC CCN NNT TGT AGT GGG GCT ATT C
Plate7	F09	WSN-rev-mut70	CCG GTG ATG TTA CAT TTN NNC AAT TGT AGT GGG GCT A
Plate7	F10	WSN-rev-mut71	CAT CCG GTG ATG TTA CAN NNC CCC AAT TGT AGT GGG G
Plate7	F11	WSN-rev-mut72	AGC CAT CCG GTG ATG TTN NNT TTC CCC AAT TGT AGT G
Plate7	F12	WSN-rev-mut73	AAG AGC CAT CCG GTG ATN NNA CAT TTC CCC AAT TGT A
Plate7	G01	WSN-rev-mut74	CCC AAG AGC CAT CCG GTN NNG TTA CAT TTC CCC AAT T
Plate7	G02	WSN-rev-mut75	TTT CCC AAG AGC CAT CCN NNG ATG TTA CAT TTC CCC A
Plate7	G03	WSN-rev-mut76	GGA TTT CCC AAG AGC CAN NNG GTG ATG TTA CAT TTC C
Plate7	G04	WSN-rev-mut77	TCT GGA TTT CCC AAG AGN NNT CCG GTG ATG TTA CAT T
Plate7	G05	WSN-rev-mut78	CAT TCT GGA TTT CCC AAN NNC CAT CCG GTG ATG TTA C
Plate7	G06	WSN-rev-mut79	TCG CAT TCT GGA TTT CCN NNG AGC CAT CCG GTG ATG T
Plate7	G07	WSN-rev-mut80	GAG TCG CAT TCT GGA TTN NNC AAG AGC CAT CCG GTG A
Plate7	G08	WSN-rev-mut81	AGT GAG TCG CAT TCT GGN NNT CCC AAG AGC CAT CCG G
Plate7	G09	WSN-rev-mut82	AGC AGT GAG TCG CAT TCN NNA TTT CCC AAG AGC CAT C
Plate7	G10	WSN-rev-mut83	GGA AGC AGT GAG TCG CAN NNT GGA TTT CCC AAG AGC C
Plate7	G11	WSN-rev-mut84	GCT GGA AGC AGT GAG TCN NNT TCT GGA TTT CCC AAG A
Plate7	G12	WSN-rev-mut85	CTC GCT GGA AGC AGT GAN NNG CAT TCT GGA TTT CCC A
Plate7	H01	WSN-rev-mut86	GAT CTC GCT GGA AGC AGN NNG TCG CAT TCT GGA TTT C
Plate7	H02	WSN-rev-mut87	CAT GAT CTC GCT GGA AGN NNT GAG TCG CAT TCT GGA T
Plate7	H03	WSN-rev-mut88	GAC CAT GAT CTC GCT GGN NNC AGT GAG TCG CAT TCT G
Plate7	H04	WSN-rev-mut89	TAG GAC CAT GAT CTC GCN NNA AGC AGT GAG TCG CAT T
Plate7	H05	WSN-rev-mut90	ATG TAG GAC CAT GAT CTN NNT GGA AGC AGT GAG TCG C
Plate7	H06	WSN-rev-mut91	ACA ATG TAG GAC CAT GAN NNC GCT GGA AGC AGT GAG T
Plate7	H07	WSN-rev-mut92	TCT ACA ATG TAG GAC CAN NNT CTC GCT GGA AGC AGT G
Plate7	H08	WSN-rev-mut93	GTT TCT ACA ATG TAG GAN NNT GAT CTC GCT GGA AGC A
Plate7	H09	WSN-rev-mut94	GGT GTT TCT ACA ATG TAN NNC CAT GAT CTC GCT GGA A
Plate7	H10	WSN-rev-mut95	TTT GGT GTT TCT ACA ATN NNG GAC CAT GAT CTC GCT G
Plate7	H11	WSN-rev-mut96	GAG TTT GGT GTT TCT ACN NNG TAG GAC CAT GAT CTC G
Plate7	H12	WSN-rev-mut97	TCA GAG TTT GGT GTT TCN NNA ATG TAG GAC CAT GAT C
Plate8	A01	WSN-rev-mut98	TTC TCA GAG TTT GGT GTN NNT ACA ATG TAG GAC CAT G
Plate8	A02	WSN-rev-mut99	CCA TTC TCA GAG TTT GGN NNT TCT ACA ATG TAG GAC C
Plate8	A03	WSN-rev-mut100	GCT CCA TTC TCA GAG TTN NNT GTT TCT ACA ATG TAG G
Plate8	A04	WSN-rev-mut101	CAT GCT CCA TTC TCA GAN NNT GGT GTT TCT ACA ATG T
Plate8	A05	WSN-rev-mut102	TAA CAT GCT CCA TTC TCN NNG TTT GGT GTT TCT ACA A
Plate8	A06	WSN-rev-mut103	GGA TAA CAT GCT CCA TTN NNA GAG TTT GGT GTT TCT A
Plate8	A07	WSN-rev-mut104	CCT GGA TAA CAT GCT CCN NNC TCA GAG TTT GGT GTT T
Plate8	A08	WSN-rev-mut105	TCT CCT GGA TAA CAT GCN NNA TTC TCA GAG TTT GGT G
Plate8	A09	WSN-rev-mut106	AGA TCT CCT GGA TAA CAN NNT CCA TTC TCA GAG TTT G
Plate8	A10	WSN-rev-mut107	ATG AGA TCT CCT GGA TAN NNT GCT CCA TTC TCA GAG T
Plate8	A11	WSN-rev-mut108	TCG ATG AGA TCT CCT GGN NNA CAT GCT CCA TTC TCA G
Plate8	A12	WSN-rev-mut109	TAG TCG ATG AGA TCT CCN NNA TAA CAT GCT CCA TTC T
Plate8	B01	WSN-rev-mut110	TCA TAG TCG ATG AGA TCN NNT GGA TAA CAT GCT CCA T
Plate8	B02	WSN-rev-mut111	TCC TCA TAG TCG ATG AGN NNT CCT GGA TAA CAT GCT C
Plate8	B03	WSN-rev-mut112	AGT TCC TCA TAG TCG ATN NNA TCT CCT GGA TAA CAT G
Plate8	B04	WSN-rev-mut113	CTC AGT TCC TCA TAG TCN NNG AGA TCT CCT GGA TAA C
Plate8	B05	WSN-rev-mut114	TCC CTC AGT TCC TCA TAN NNG ATG AGA TCT CCT GGA T
Plate8	B06	WSN-rev-mut115	TGC TCC CTC AGT TCC TCN NNG TCG ATG AGA TCT CCT G
Plate8	B07	WSN-rev-mut116	AAT TGC TCC CTC AGT TCN NNA TAG TCG ATG AGA TCT C
Plate8	B08	WSN-rev-mut117	CTC AAT TGC TCC CTC AGN NNC TCA TAG TCG ATG AGA T
Plate8	B09	WSN-rev-mut118	GAG CTC AAT TGC TCC CTN NNT TCC TCA TAG TCG ATG A
Plate8	B10	WSN-rev-mut119	ACT GAG CTC AAT TGC TCN NNC AGT TCC TCA TAG TCG A
Plate8	B11	WSN-rev-mut120	GAT ACT GAG CTC AAT TGN NNC CTC AGT TCC TCA TAG T
Plate8	B12	WSN-rev-mut121	GAT GAT ACT GAG CTC AAN NNC TCC CTC AGT TCC TCA T
Plate8	C01	WSN-rev-mut122	AAT GAT GAT ACT GAG CTN NNT TGC TCC CTC AGT TCC T
Plate8	C02	WSN-rev-mut123	TCT AAT GAT GAT ACT GAN NNC AAT TGC TCC CTC AGT T
Plate8	C03	WSN-rev-mut124	CTT TCT AAT GAT GAT ACN NNG CTC AAT TGC TCC CTC A
Plate8	C04	WSN-rev-mut125	AAT CTT TCT AAT GAT GAN NNT GAG CTC AAT TGC TCC C
Plate8	C05	WSN-rev-mut126	TCG AAT CTT TCT AAT GAN NNT ACT GAG CTC AAT TGC T
Plate8	C06	WSN-rev-mut127	ATT TCG AAT CTT TCT AAN NNT GAT ACT GAG CTC AAT T
Plate8	C07	WSN-rev-mut128	AAT ATT TCG AAT CTT TCN NNT GAT GAT ACT GAG CTC A
Plate8	C08	WSN-rev-mut129	GGA AAT ATT TCG AAT CTN NNT AAT GAT GAT ACT GAG C
Plate8	C09	WSN-rev-mut130	TTG GGA AAT ATT TCG AAN NNT TCT AAT GAT GAT ACT G
Plate8	C10	WSN-rev-mut131	TCC TTG GGA AAT ATT TCN NNT CTT TCT AAT GAT GAT A
Plate8	C11	WSN-rev-mut132	CTT TCC TTG GGA AAT ATN NNG AAT CTT TCT AAT GAT G
Plate8	C12	WSN-rev-mut133	GAA CTT TCC TTG GGA AAN NNT TCG AAT CTT TCT AAT G
Plate8	D01	WSN-rev-mut134	CAT GAA CTT TCC TTG GGN NNT ATT TCG AAT CTT TCT A
Plate8	D02	WSN-rev-mut135	GGC CAT GAA CTT TCC TTN NNA AAT ATT TCG AAT CTT T
Plate8	D03	WSN-rev-mut136	TTG GGC CAT GAA CTT TCN NNG GGA AAT ATT TCG AAT C
Plate8	D04	WSN-rev-mut137	TGG TTG GGC CAT GAA CTN NNC TTG GGA AAT ATT TCG A
Plate8	D05	WSN-rev-mut138	GTG TGG TTG GGC CAT GAN NNT TCC TTG GGA AAT ATT T
Plate8	D06	WSN-rev-mut139	AAT GTG TGG TTG GGC CAN NNA CTT TCC TTG GGA AAT A
Plate8	D07	WSN-rev-mut140	TTG AAT GTG TGG TTG GGN NNT GAA CTT TCC TTG GGA A
Plate8	D08	WSN-rev-mut141	CCG TTG AAT GTG TGG TTN NNC CAT GAA CTT TCC TTG G
Plate8	D09	WSN-rev-mut142	ACT CCG TTG AAT GTG TGN NNG GGC CAT GAA CTT TCC T
Plate8	D10	WSN-rev-mut143	GTT ACT CCG TTG AAT GTN NNG TTG GGC CAT GAA CTT T
Plate8	D11	WSN-rev-mut144	ACT GTT ACT CCG TTG AAN NNG TGG TTG GGC CAT GAA C
Plate8	D12	WSN-rev-mut145	GAT ACT GTT ACT CCG TTN NNT GTG TGG TTG GGC CAT G
Plate8	E01	WSN-rev-mut146	CAT GAT ACT GTT ACT CCN NNG AAT GTG TGG TTG GGC C
Plate8	E02	WSN-rev-mut147	GAG CAT GAT ACT GTT ACN NNG TTG AAT GTG TGG TTG G
Plate8	E03	WSN-rev-mut148	TGG GAG CAT GAT ACT GTN NNT CCG TTG AAT GTG TGG T
Plate8	E04	WSN-rev-mut149	CTA TGG GAG CAT GAT ACN NNT ACT CCG TTG AAT GTG T
Plate8	E05	WSN-rev-mut150	CCC CTA TGG GAG CAT GAN NNT GTT ACT CCG TTG AAT G
Plate8	E06	WSN-rev-mut151	TTT CCC CTA TGG GAG CAN NNT ACT GTT ACT CCG TTG A
Plate8	E07	WSN-rev-mut152	CTT TTT CCC CTA TGG GAN NNT GAT ACT GTT ACT CCG T
Plate8	E08	WSN-rev-mut153	CTG CTT TTT CCC CTA TGN NNG CAT GAT ACT GTT ACT C
Plate8	E09	WSN-rev-mut154	AAA CTG CTT TTT CCC CTN NNG GAG CAT GAT ACT GTT A
Plate8	E10	WSN-rev-mut155	TAA AAA CTG CTT TTT CCN NNA TGG GAG CAT GAT ACT G
Plate8	E11	WSN-rev-mut156	CTG TAA AAA CTG CTT TTN NNC CTA TGG GAG CAT GAT A
Plate8	E12	WSN-rev-mut157	TTT CTG TAA AAA CTG CTN NNT CCC CTA TGG GAG CAT G
Plate8	F01	WSN-rev-mut158	AAA TTT CTG TAA AAA CTN NNT TTT CCC CTA TGG GAG C
Plate8	F02	WSN-rev-mut159	AGC AAA TTT CTG TAA AAN NNG CTT TTT CCC CTA TGG G
Plate8	F03	WSN-rev-mut160	CAT AGC AAA TTT CTG TAN NNA CTG CTT TTT CCC CTA T
Plate8	F04	WSN-rev-mut161	AGC CAT AGC AAA TTT CTN NNA AAA CTG CTT TTT CCC C
Plate8	F05	WSN-rev-mut162	GTC AGC CAT AGC AAA TTN NNG TAA AAA CTG CTT TTT C
Plate8	F06	WSN-rev-mut163	TTC GTC AGC CAT AGC AAN NNT CTG TAA AAA CTG CTT T
Plate8	F07	WSN-rev-mut164	TTC TTC GTC AGC CAT AGN NNA TTT CTG TAA AAA CTG C
Plate8	F08	WSN-rev-mut165	CCC TTC TTC GTC AGC CAN NNC AAA TTT CTG TAA AAA C
Plate8	F09	WSN-rev-mut166	TCC CCC TTC TTC GTC AGN NNT AGC AAA TTT CTG TAA A
Plate8	F10	WSN-rev-mut167	GAA TCC CCC TTC TTC GTN NNC CAT AGC AAA TTT CTG T
Plate8	F11	WSN-rev-mut168	TAT GAA TCC CCC TTC TTN NNC AGC CAT AGC AAA TTT C
Plate8	F12	WSN-rev-mut169	GGG TAT GAA TCC CCC TTN NNC GTC AGC CAT AGC AAA T
Plate8	G01	WSN-rev-mut170	TTT GGG TAT GAA TCC CCN NNC TTC GTC AGC CAT AGC A
Plate8	G02	WSN-rev-mut171	AGC TTT GGG TAT GAA TCN NNC TTC TTC GTC AGC CAT A
Plate8	G03	WSN-rev-mut172	GTC AGC TTT GGG TAT GAN NNC CCC TTC TTC GTC AGC C
Plate8	G04	WSN-rev-mut173	TTG GTC AGC TTT GGG TAN NNA TCC CCC TTC TTC GTC A
Plate8	G05	WSN-rev-mut174	GAA TTG GTC AGC TTT GGN NNT GAA TCC CCC TTC TTC G
Plate8	G06	WSN-rev-mut175	TAG GAA TTG GTC AGC TTN NNG TAT GAA TCC CCC TTC T
Plate8	G07	WSN-rev-mut176	ACA TAG GAA TTG GTC AGN NNT GGG TAT GAA TCC CCC T
Plate8	G08	WSN-rev-mut177	TTC ACA TAG GAA TTG GTN NNC TTT GGG TAT GAA TCC C
Plate8	G09	WSN-rev-mut178	TTG TTC ACA TAG GAA TTN NNC AGC TTT GGG TAT GAA T
Plate8	G10	WSN-rev-mut179	TTA TTG TTC ACA TAG GAN NNG GTC AGC TTT GGG TAT G
Plate8	G11	WSN-rev-mut180	CCT TTA TTG TTC ACA TAN NNA TTG GTC AGC TTT GGG T
Plate8	G12	WSN-rev-mut181	TTC CCT TTA TTG TTC ACN NNG GAA TTG GTC AGC TTT G
Plate8	H01	WSN-rev-mut182	TCT TTC CCT TTA TTG TTN NNA TAG GAA TTG GTC AGC T
Plate8	H02	WSN-rev-mut183	ACT TCT TTC CCT TTA TTN NNC ACA TAG GAA TTG GTC A
Plate8	H03	WSN-rev-mut184	AGG ACT TCT TTC CCT TTN NNG TTC ACA TAG GAA TTG G
Plate8	H04	WSN-rev-mut185	ACA AGG ACT TCT TTC CCN NNA TTG TTC ACA TAG GAA T
Plate8	H05	WSN-rev-mut186	AGT ACA AGG ACT TCT TTN NNT TTA TTG TTC ACA TAG G
Plate8	H06	WSN-rev-mut187	CAT AGT ACA AGG ACT TCN NNC CCT TTA TTG TTC ACA T
Plate8	H07	WSN-rev-mut188	CCC CAT AGT ACA AGG ACN NNT TTC CCT TTA TTG TTC A
Plate8	H08	WSN-rev-mut189	ACA CCC CAT AGT ACA AGN NNT TCT TTC CCT TTA TTG T
Plate8	H09	WSN-rev-mut190	TGA ACA CCC CAT AGT ACN NNG ACT TCT TTC CCT TTA T
Plate8	H10	WSN-rev-mut191	TGA TGA ACA CCC CAT AGN NNA AGG ACT TCT TTC CCT T
Plate8	H11	WSN-rev-mut192	GGG TGA TGA ACA CCC CAN NNT ACA AGG ACT TCT TTC C
Plate8	H12	WSN-rev-mut193	GAC GGG TGA TGA ACA CCN NNT AGT ACA AGG ACT TCT T
Plate9	A01	WSN-rev-mut194	CTA GAC GGG TGA TGA ACN NNC CAT AGT ACA AGG ACT T
Plate9	A02	WSN-rev-mut195	CTG CTA GAC GGG TGA TGN NNA CCC CAT AGT ACA AGG A
Plate9	A03	WSN-rev-mut196	TCA CTG CTA GAC GGG TGN NNA ACA CCC CAT AGT ACA A
Plate9	A04	WSN-rev-mut197	TCA TCA CTG CTA GAC GGN NNA TGA ACA CCC CAT AGT A
Plate9	A05	WSN-rev-mut198	TGC TCA TCA CTG CTA GAN NNG TGA TGA ACA CCC CAT A
Plate9	A06	WSN-rev-mut199	TGT TGC TCA TCA CTG CTN NNC GGG TGA TGA ACA CCC C
Plate9	A07	WSN-rev-mut200	CTC TGT TGC TCA TCA CTN NNA GAC GGG TGA TGA ACA C
Plate9	A08	WSN-rev-mut201	AGA CTC TGT TGC TCA TCN NNG CTA GAC GGG TGA TGA A
Plate9	A09	WSN-rev-mut202	TAG AGA CTC TGT TGC TCN NNA CTG CTA GAC GGG TGA T
Plate9	A10	WSN-rev-mut203	CTA TAG AGA CTC TGT TGN NNA TCA CTG CTA GAC GGG T
Plate9	A11	WSN-rev-mut204	TTA CTA TAG AGA CTC TGN NNC TCA TCA CTG CTA GAC G
Plate9	A12	WSN-rev-mut205	CCA TTA CTA TAG AGA CTN NNT TGC TCA TCA CTG CTA G
Plate9	B01	WSN-rev-mut206	TTT CCA TTA CTA TAG AGN NNC TGT TGC TCA TCA CTG C
Plate9	B02	WSN-rev-mut207	GCA TTT CCA TTA CTA TAN NNA CTC TGT TGC TCA TCA C
Plate9	B03	WSN-rev-mut208	TAA GCA TTT CCA TTA CTN NNG AGA CTC TGT TGC TCA T
Plate9	B04	WSN-rev-mut209	ACA TAA GCA TTT CCA TTN NNA TAG AGA CTC TGT TGC T
Plate9	B05	WSN-rev-mut210	GAG ACA TAA GCA TTT CCN NNA CTA TAG AGA CTC TGT T
Plate9	B06	WSN-rev-mut211	ACA GAG ACA TAA GCA TTN NNA TTA CTA TAG AGA CTC T
Plate9	B07	WSN-rev-mut212	GCT ACA GAG ACA TAA GCN NNT CCA TTA CTA TAG AGA C
Plate9	B08	WSN-rev-mut213	GAC GCT ACA GAG ACA TAN NNA TTT CCA TTA CTA TAG A
Plate9	B09	WSN-rev-mut214	GAA GAC GCT ACA GAG ACN NNA GCA TTT CCA TTA CTA T
Plate9	B10	WSN-rev-mut215	TTT GAA GAC GCT ACA GAN NNA TAA GCA TTT CCA TTA C
Plate9	B11	WSN-rev-mut216	TAA TTT GAA GAC GCT ACN NNG ACA TAA GCA TTT CCA T
Plate9	B12	WSN-rev-mut217	TTA TAA TTT GAA GAC GCN NNA GAG ACA TAA GCA TTT C
Plate9	C01	WSN-rev-mut218	CTG TTA TAA TTT GAA GAN NNT ACA GAG ACA TAA GCA T
Plate9	C02	WSN-rev-mut219	CTC CTG TTA TAA TTT GAN NNC GCT ACA GAG ACA TAA G
Plate9	C03	WSN-rev-mut220	AAT CTC CTG TTA TAA TTN NNA GAC GCT ACA GAG ACA T
Plate9	C04	WSN-rev-mut221	GTG AAT CTC CTG TTA TAN NNT GAA GAC GCT ACA GAG A
Plate9	C05	WSN-rev-mut222	GGG GTG AAT CTC CTG TTN NNA TTT GAA GAC GCT ACA G
Plate9	C06	WSN-rev-mut223	TCC GGG GTG AAT CTC CTN NNA TAA TTT GAA GAC GCT A
Plate9	C07	WSN-rev-mut224	ATT TCC GGG GTG AAT CTN NNG TTA TAA TTT GAA GAC G
Plate9	C08	WSN-rev-mut225	GCT ATT TCC GGG GTG AAN NNC CTG TTA TAA TTT GAA G
Plate9	C09	WSN-rev-mut226	GCA GCT ATT TCC GGG GTN NNT CTC CTG TTA TAA TTT G
Plate9	C10	WSN-rev-mut227	CTT GCA GCT ATT TCC GGN NNG AAT CTC CTG TTA TAA T
Plate9	C11	WSN-rev-mut228	GGC CTT GCA GCT ATT TCN NNG GTG AAT CTC CTG TTA T
Plate9	C12	WSN-rev-mut229	TTG GGC CTT GCA GCT ATN NNC GGG GTG AAT CTC CTG T
Plate9	D01	WSN-rev-mut230	ACT TTG GGC CTT GCA GCN NNT TCC GGG GTG AAT CTC C
Plate9	D02	WSN-rev-mut231	CTT ACT TTG GGC CTT GCN NNT ATT TCC GGG GTG AAT C
Plate9	D03	WSN-rev-mut232	TCT CTT ACT TTG GGC CTN NNA GCT ATT TCC GGG GTG A
Plate9	D04	WSN-rev-mut233	TGA TCT CTT ACT TTG GGN NNT GCA GCT ATT TCC GGG G
Plate9	D05	WSN-rev-mut234	TGT TGA TCT CTT ACT TTN NNC CTT GCA GCT ATT TCC G
Plate9	D06	WSN-rev-mut235	CCA TGT TGA TCT CTT ACN NNG GGC CTT GCA GCT ATT T
Plate9	D07	WSN-rev-mut236	CTC CCA TGT TGA TCT CTN NNT TTG GGC CTT GCA GCT A
Plate9	D08	WSN-rev-mut237	ATC CTC CCA TGT TGA TCN NNT ACT TTG GGC CTT GCA G
Plate9	D09	WSN-rev-mut238	TTC ATC CTC CCA TGT TGN NNT CTT ACT TTG GGC CTT G
Plate9	D10	WSN-rev-mut239	TAG TTC ATC CTC CCA TGN NNA TCT CTT ACT TTG GGC C
Plate9	D11	WSN-rev-mut240	TAA TAG TTC ATC CTC CCN NNT TGA TCT CTT ACT TTG G
Plate9	D12	WSN-rev-mut241	CAG TAA TAG TTC ATC CTN NNA TGT TGA TCT CTT ACT T
Plate9	E01	WSN-rev-mut242	GTC CAG TAA TAG TTC ATN NNC CCA TGT TGA TCT CTT A
Plate9	E02	WSN-rev-mut243	AAG GTC CAG TAA TAG TTN NNC CTC CCA TGT TGA TCT C
Plate9	E03	WSN-rev-mut244	AGC AAG GTC CAG TAA TAN NNC ATC CTC CCA TGT TGA T
Plate9	E04	WSN-rev-mut245	TCT AGC AAG GTC CAG TAN NNG TTC ATC CTC CCA TGT T
Plate9	E05	WSN-rev-mut246	GGT TCT AGC AAG GTC CAN NNA TAG TTC ATC CTC CCA T
Plate9	E06	WSN-rev-mut247	CCG GGT TCT AGC AAG GTN NNG TAA TAG TTC ATC CTC C
Plate9	E07	WSN-rev-mut248	TCT CCG GGT TCT AGC AAN NNC CAG TAA TAG TTC ATC C
Plate9	E08	WSN-rev-mut249	GTG TCT CCG GGT TCT AGN NNG GTC CAG TAA TAG TTC A
Plate9	E09	WSN-rev-mut250	ATT GTG TCT CCG GGT TCN NNC AAG GTC CAG TAA TAG T
Plate9	E10	WSN-rev-mut251	ATT ATT GTG TCT CCG GGN NNT AGC AAG GTC CAG TAA T
Plate9	E11	WSN-rev-mut252	AAT ATT ATT GTG TCT CCN NNT TCT AGC AAG GTC CAG T
Plate9	E12	WSN-rev-mut253	TCA AAT ATT ATT GTG TCN NNG GGT TCT AGC AAG GTC C
Plate9	F01	WSN-rev-mut254	GCC TCA AAT ATT ATT GTN NNT CCG GGT TCT AGC AAG G
Plate9	F02	WSN-rev-mut255	GTT GCC TCA AAT ATT ATN NNG TCT CCG GGT TCT AGC A
Plate9	F03	WSN-rev-mut256	CCA GTT GCC TCA AAT ATN NNT GTG TCT CCG GGT TCT A
Plate9	F04	WSN-rev-mut257	TTA CCA GTT GCC TCA AAN NNT ATT GTG TCT CCG GGT T
Plate9	F05	WSN-rev-mut258	AGA TTA CCA GTT GCC TCN NNT ATT ATT GTG TCT CCG G
Plate9	F06	WSN-rev-mut259	ATT AGA TTA CCA GTT GCN NNA AAT ATT ATT GTG TCT C
Plate9	F07	WSN-rev-mut260	GCT ATT AGA TTA CCA GTN NNC TCA AAT ATT ATT GTG T
Plate9	F08	WSN-rev-mut261	GGT GCT ATT AGA TTA CCN NNT GCC TCA AAT ATT ATT G
Plate9	F09	WSN-rev-mut262	CAT GGT GCT ATT AGA TTN NNA GTT GCC TCA AAT ATT A
Plate9	F10	WSN-rev-mut263	TAC CAT GGT GCT ATT AGN NNA CCA GTT GCC TCA AAT A
Plate9	F11	WSN-rev-mut264	GCA TAC CAT GGT GCT ATN NNA TTA CCA GTT GCC TCA A
Plate9	F12	WSN-rev-mut265	AAA GCA TAC CAT GGT GCN NNT AGA TTA CCA GTT GCC T
Plate9	G01	WSN-rev-mut266	GCG AAA GCA TAC CAT GGN NNT ATT AGA TTA CCA GTT G
Plate9	G02	WSN-rev-mut267	AGT GCG AAA GCA TAC CAN NNT GCT ATT AGA TTA CCA G
Plate9	G03	WSN-rev-mut268	CTC AGT GCG AAA GCA TAN NNT GGT GCT ATT AGA TTA C
Plate9	G04	WSN-rev-mut269	CTA CTC AGT GCG AAA GCN NNC CAT GGT GCT ATT AGA T
Plate9	G05	WSN-rev-mut270	CCT CTA CTC AGT GCG AAN NNA TAC CAT GGT GCT ATT A
Plate9	G06	WSN-rev-mut271	AAC CCT CTA CTC AGT GCN NNA GCA TAC CAT GGT GCT A
Plate9	G07	WSN-rev-mut272	TCA AAC CCT CTA CTC AGN NNG AAA GCA TAC CAT GGT G
Plate9	G08	WSN-rev-mut273	GAC TCA AAC CCT CTA CTN NNT GCG AAA GCA TAC CAT G
Plate9	G09	WSN-rev-mut274	CCG GAC TCA AAC CCT CTN NNC AGT GCG AAA GCA TAC C
Plate9	G10	WSN-rev-mut275	ATG CCG GAC TCA AAC CCN NNA CTC AGT GCG AAA GCA T
Plate9	G11	WSN-rev-mut276	ATG ATG CCG GAC TCA AAN NNT CTA CTC AGT GCG AAA G
Plate9	G12	WSN-rev-mut277	GTG ATG ATG CCG GAC TCN NNC CCT CTA CTC AGT GCG A
Plate9	H01	WSN-rev-mut278	GAG GTG ATG ATG CCG GAN NNA AAC CCT CTA CTC AGT G
Plate9	H02	WSN-rev-mut279	TTT GAG GTG ATG ATG CCN NNC TCA AAC CCT CTA CTC A
Plate9	H03	WSN-rev-mut280	GCG TTT GAG GTG ATG ATN NNG GAC TCA AAC CCT CTA C
Plate9	H04	WSN-rev-mut281	GAC GCG TTT GAG GTG ATN NNG CCG GAC TCA AAC CCT C
Plate9	H05	WSN-rev-mut282	ATT GAC GCG TTT GAG GTN NNG ATG CCG GAC TCA AAC C
Plate9	H06	WSN-rev-mut283	TGC ATT GAC GCG TTT GAN NNG ATG ATG CCG GAC TCA A
Plate9	H07	WSN-rev-mut284	TCA TGC ATT GAC GCG TTN NNG GTG ATG ATG CCG GAC T
Plate9	H08	WSN-rev-mut285	CAC TCA TGC ATT GAC GCN NNT GAG GTG ATG ATG CCG G
Plate9	H09	WSN-rev-mut286	TTA CAC TCA TGC ATT GAN NNG TTT GAG GTG ATG ATG C
Plate9	H10	WSN-rev-mut287	GTG TTA CAC TCA TGC ATN NNC GCG TTT GAG GTG ATG A
Plate9	H11	WSN-rev-mut288	TTC GTG TTA CAC TCA TGN NNT GAC GCG TTT GAG GTG A
Plate9	H12	WSN-rev-mut289	CAC TTC GTG TTA CAC TCN NNC ATT GAC GCG TTT GAG G
