# Supplementary figures and images for: The inherent mutational tolerance and antigenic evolvability of influenza hemagglutinin
Source: eLife journal article supplement (doi:10.7554/elife.03300), 2014-07-08

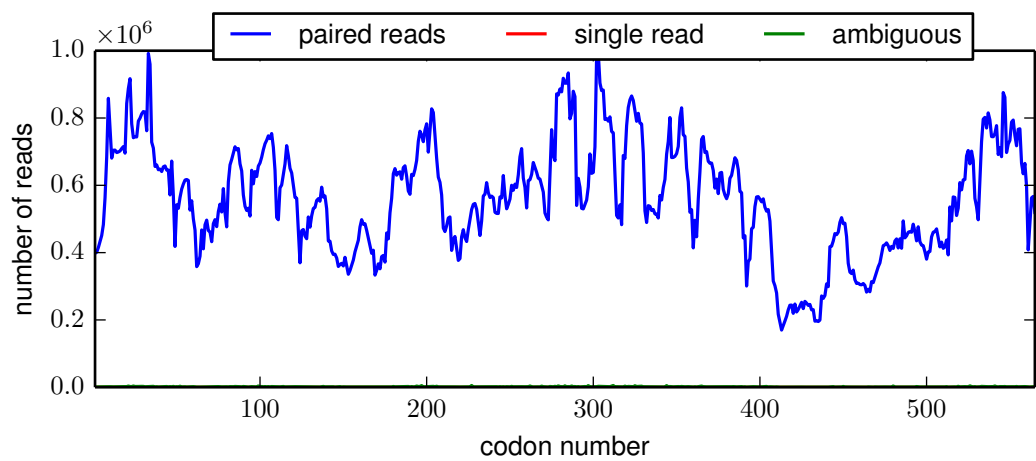

Supplement: supp [file elife-03300-supp-v1.zip]

**A**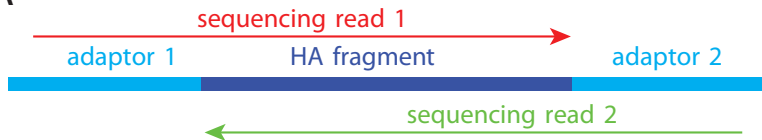**B**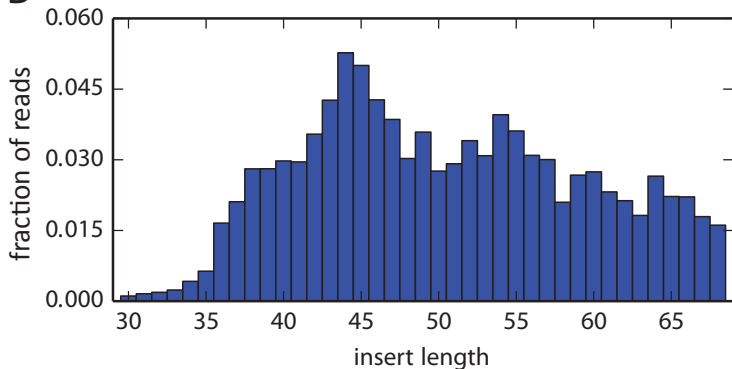

Supplement: supp [file elife-03300-supp-v1.zip]

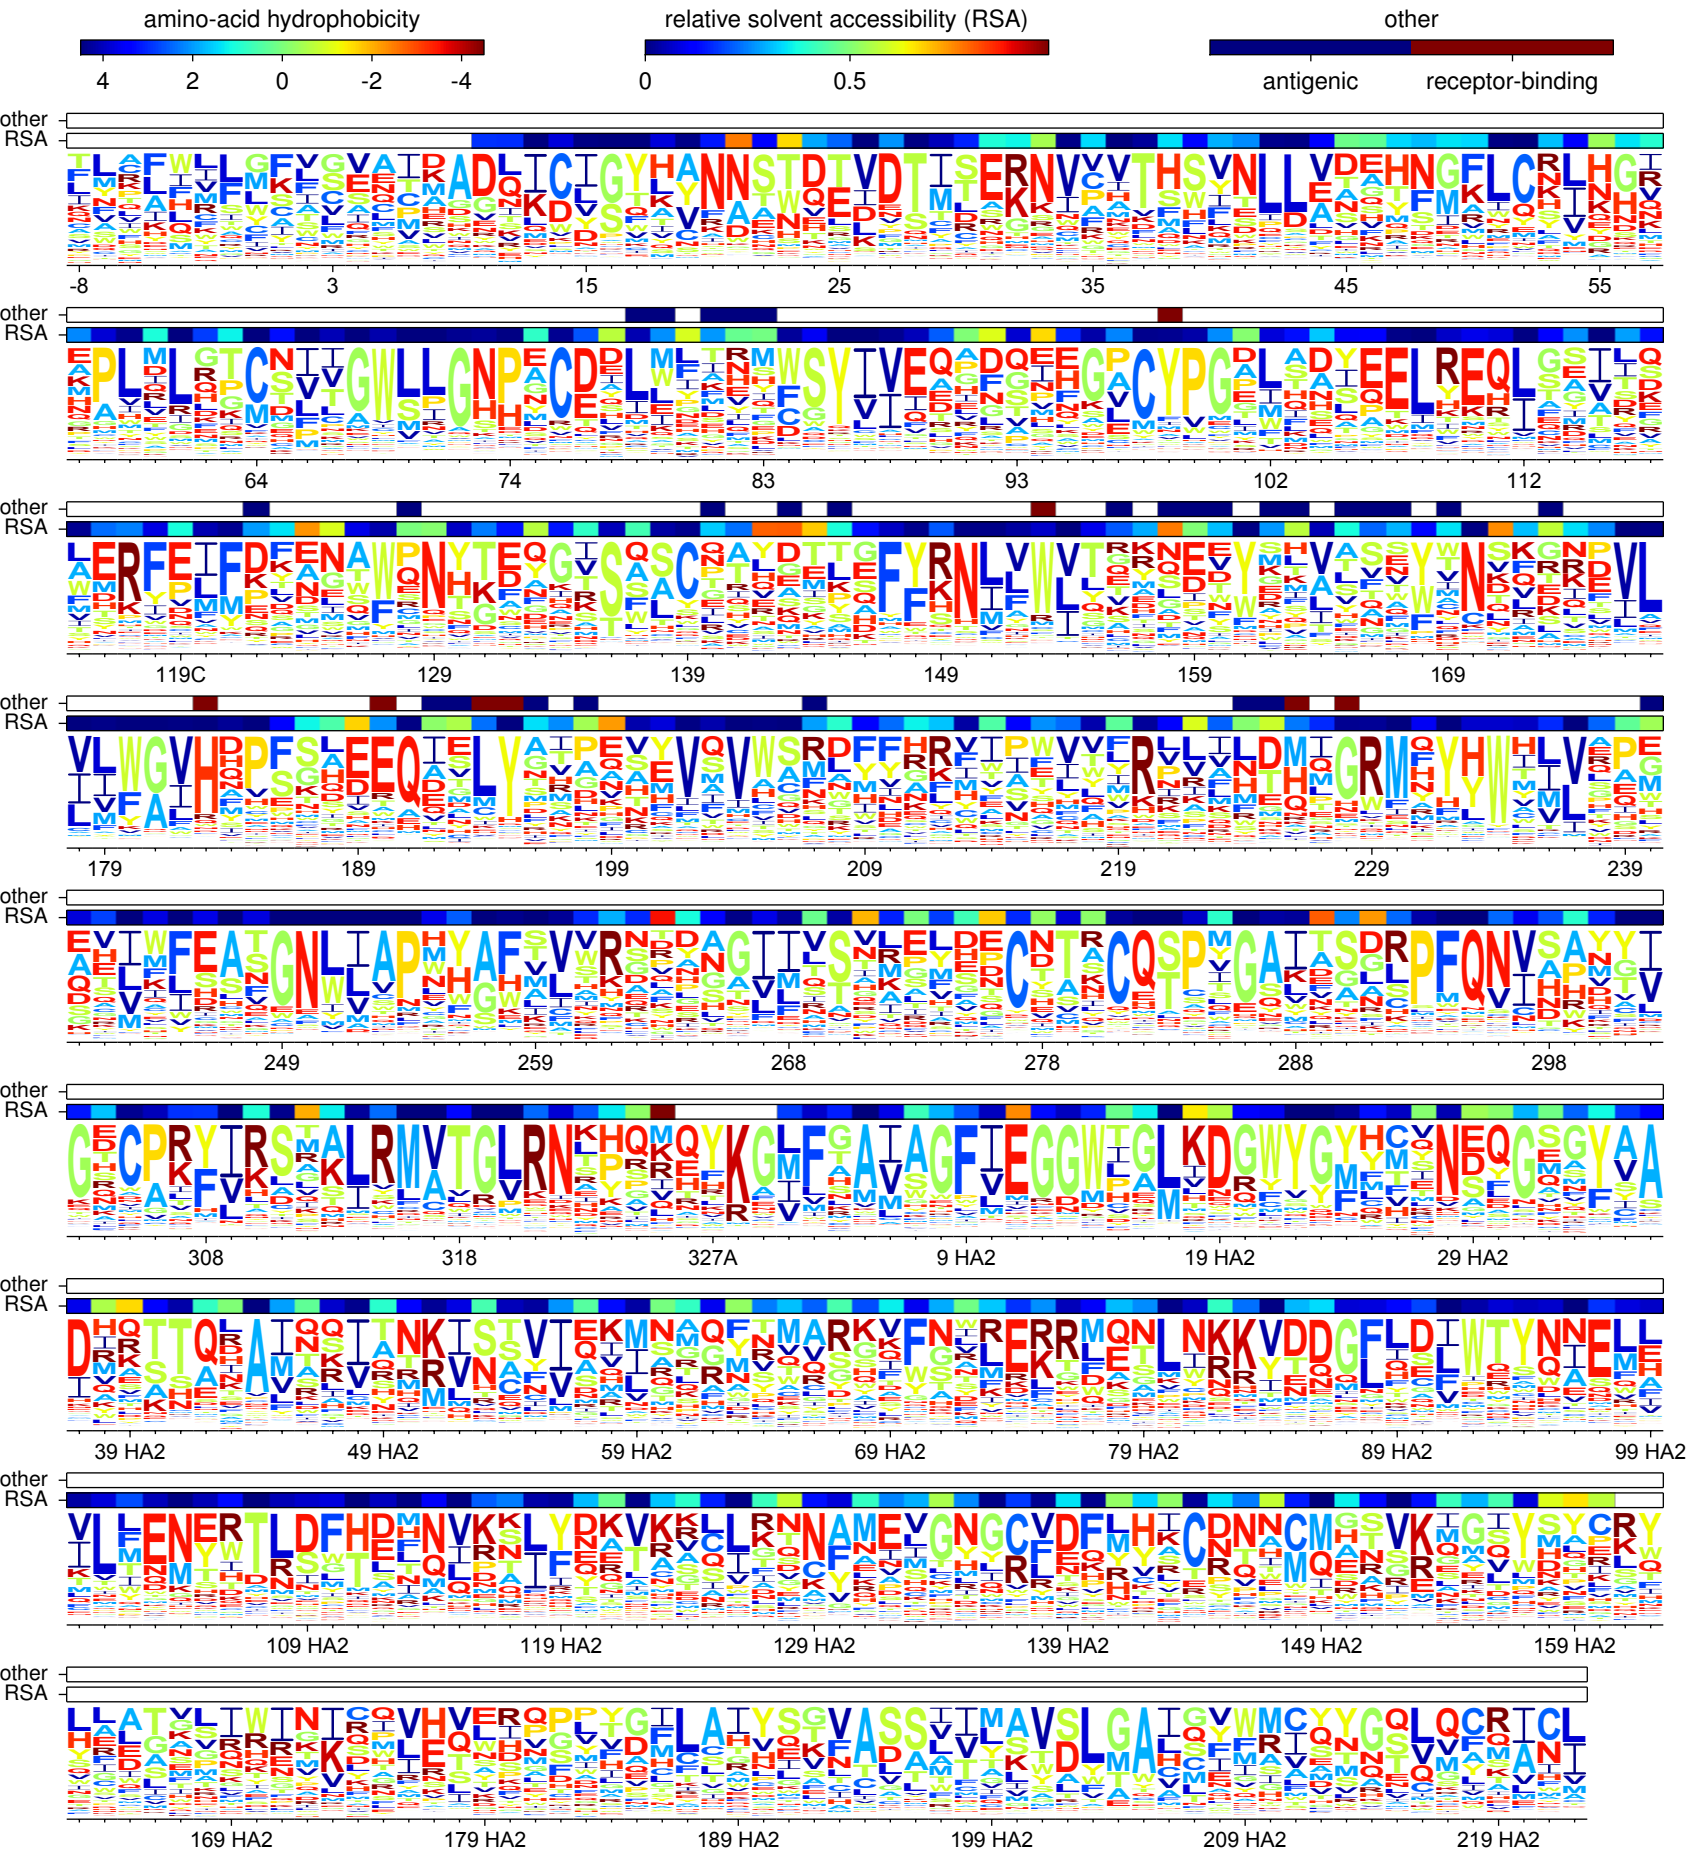

Supplement: supp [file elife-03300-supp-v1.zip]

number of read pairs

$\times 10^7$

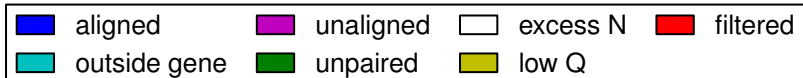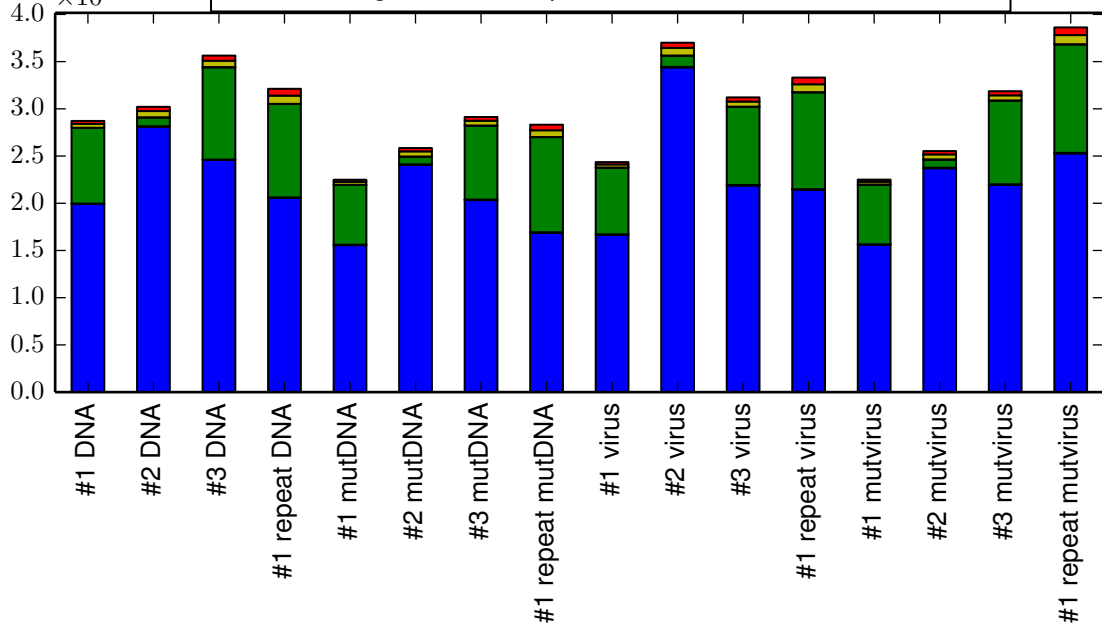

Supplement: supp [file elife-03300-supp-v1.zip]

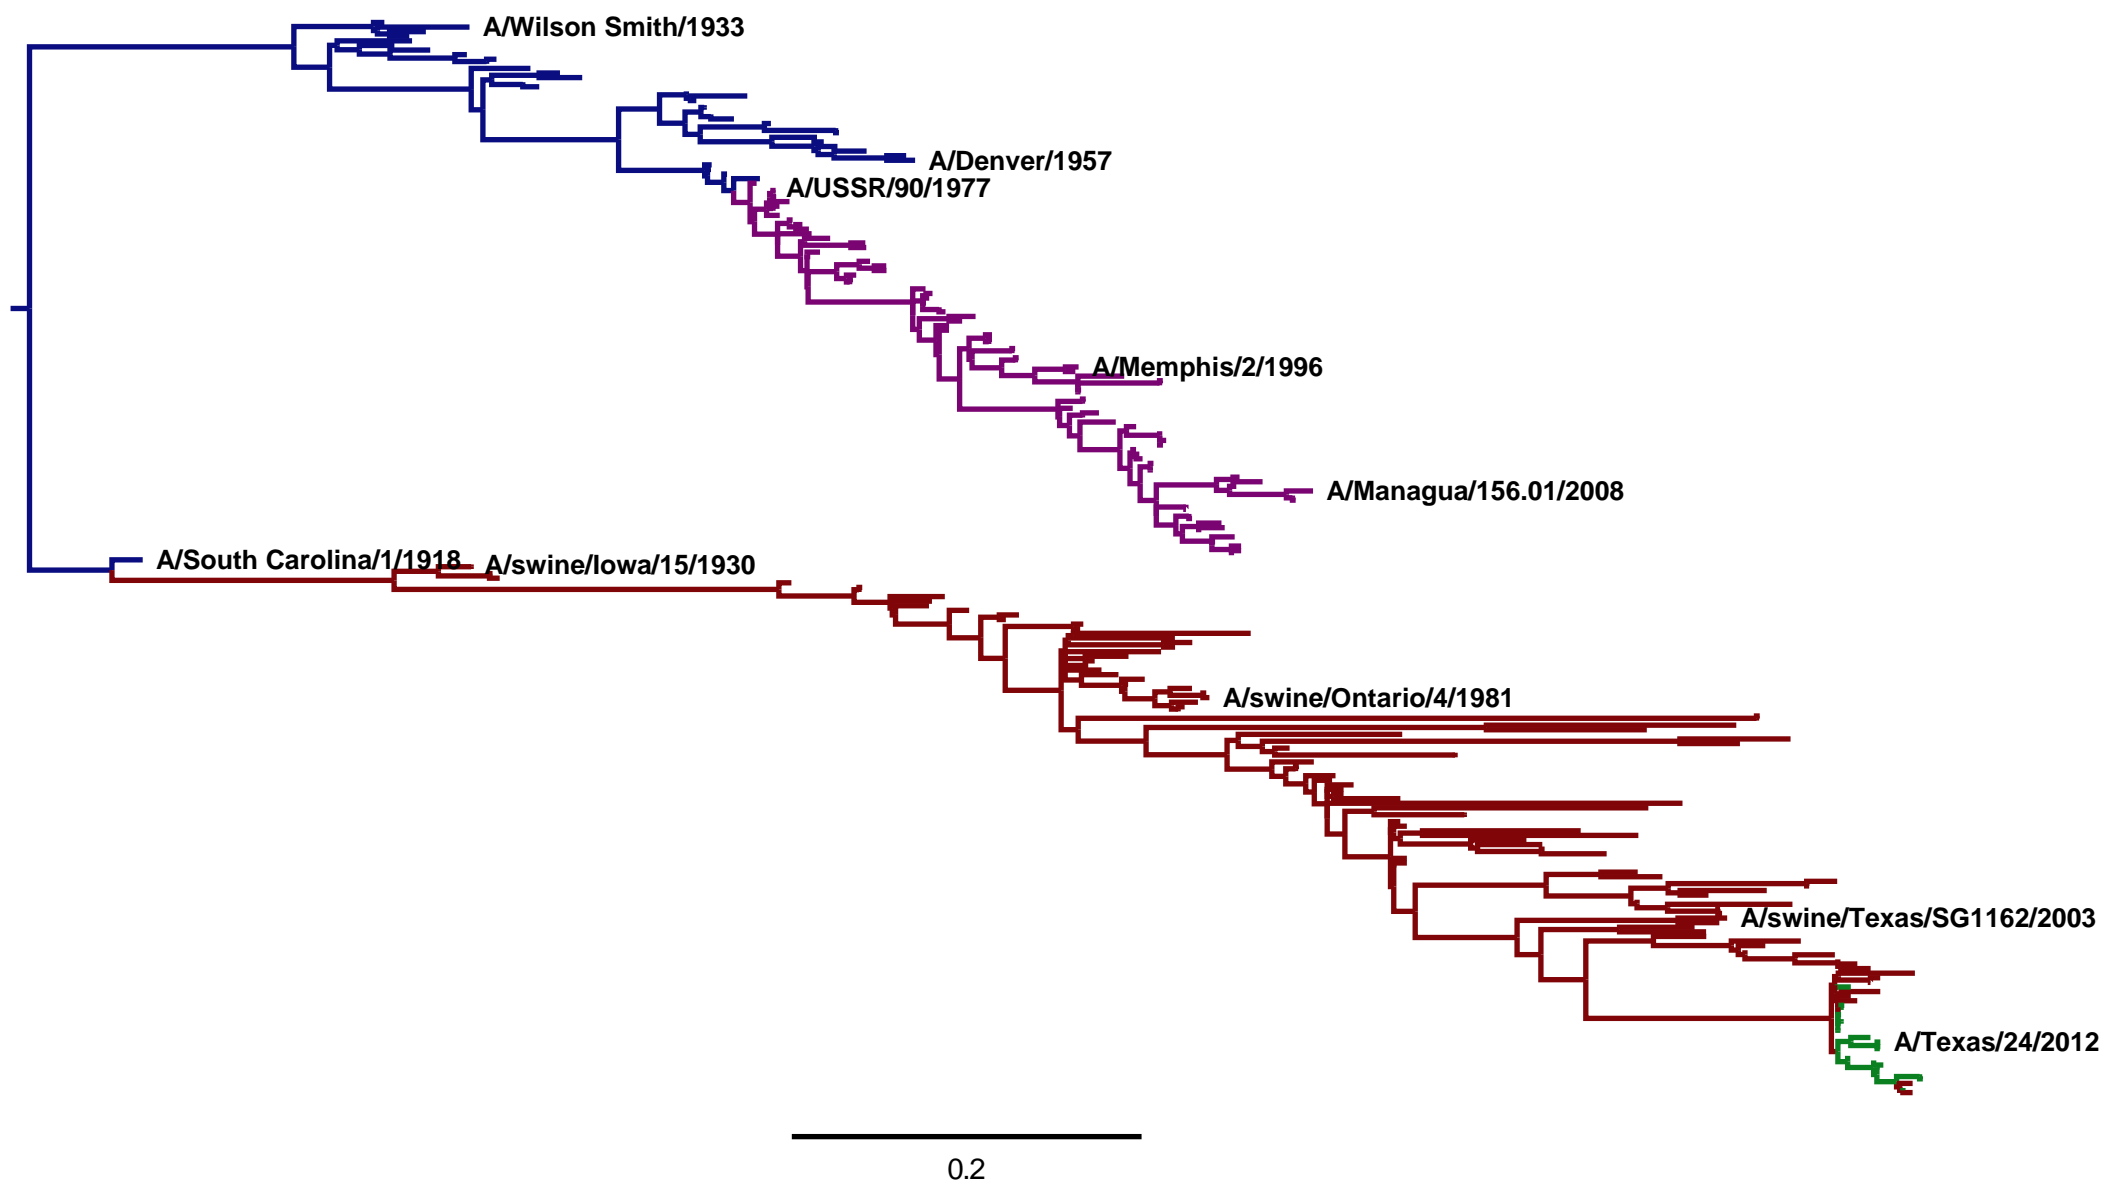

Supplement: supp [file elife-03300-supp-v1.zip]
